# Supplementary material for: Molecular Mechanisms of Cassia fistula against Epithelial Ovarian Cancer Using Network Pharmacology and Molecular Docking Approaches
Source: MDPI journal article supplement (doi:10.3390/pharmaceutics14091970), 2022-09-19
Supplement: s1 [file s1]

# Supplementary Materials: Molecular Mechanisms of *Cassia fistula* against Epithelial Ovarian Cancer Using Network Pharmacology and Molecular Docking Approaches

Aqsa Kanwal <sup>1,†</sup>, Farrukh Azeem <sup>1,†</sup>, Habibullah Nadeem <sup>1</sup>, Usman Ali Ashfaq <sup>1</sup>, Rana Muhammad Aadil <sup>2</sup>, A. K. M. Humayun Kober <sup>3</sup>, Muhammad Shahid Riaz Rajoka <sup>4</sup>, Ijaz Rasul <sup>1,\*</sup>

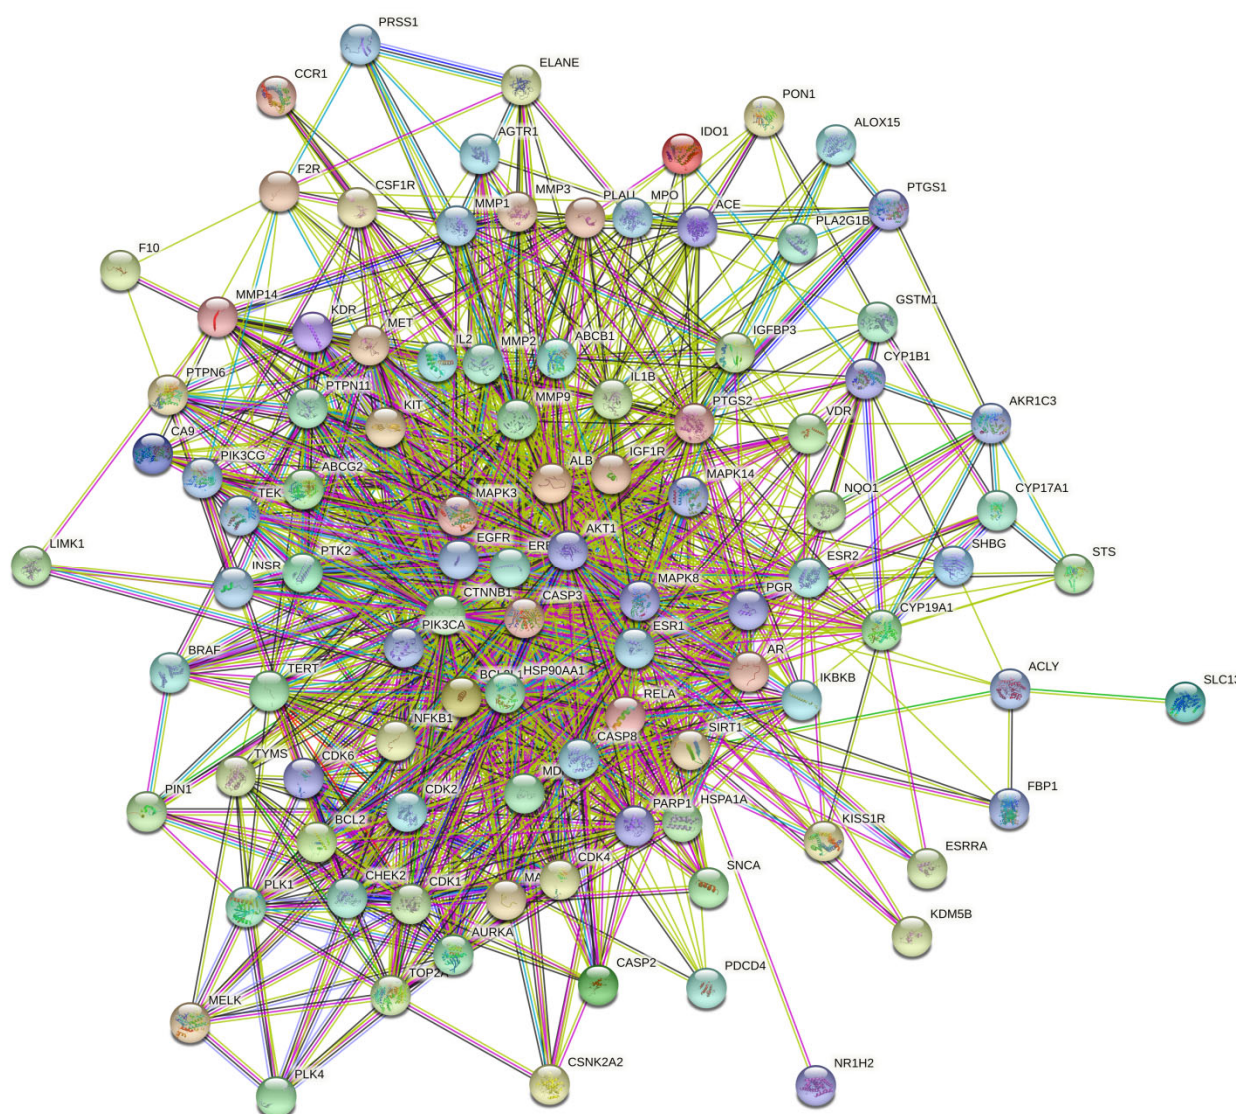

**Figure S1.** PPI network constructed by STRING. It represents the interaction of potential genes of *C. fistula* against EOC.

**Table S1.** Phytochemical library of *C. fistula*.

| Sr.<br>No. | Phytochemical<br>Names             | Mol.<br>Formula                                 | Mol.<br>Weight<br>(Dalton) | OB    | DL   | PubChem<br>ID | 2D structure                                                                          |
|------------|------------------------------------|-------------------------------------------------|----------------------------|-------|------|---------------|---------------------------------------------------------------------------------------|
| 01         | 3,4-di-O-<br>caffeoylquinic acid   | C <sub>25</sub> H <sub>24</sub> O <sub>12</sub> | 516.46                     | 1.78  | 0.69 | 5281780       | 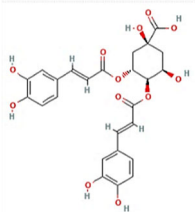   |
| 02         | HOP-22(29)-EN-3.<br>BETA.-OL       | C <sub>30</sub> H <sub>50</sub> O               | 426.7                      | -     | -    | 604951        |    |
| 03         | 2,5-Dimethyl-7-<br>hydroxychromone | C <sub>11</sub> H <sub>10</sub> O <sub>3</sub>  | 190.2                      | 16.13 | 0.08 | 5316891       |   |
| 04         | apigenin-6,8-di-C-<br>glycoside    | C <sub>27</sub> H <sub>30</sub> O <sub>15</sub> | 594.52                     | 3.42  | 0.78 | 442666        |  |
| 05         | 1-Octacosanol                      | C <sub>28</sub> H <sub>58</sub> O               | 410.8                      | 10.70 | 0.41 | 68406         |  |

|    |                            |                 |        |       |      |         |                                                                                       |
|----|----------------------------|-----------------|--------|-------|------|---------|---------------------------------------------------------------------------------------|
| 06 | 5<br>hydroxymethylfurfural | $C_6H_6O_3$     | 126.11 | 45.07 | 0.02 | 237332  | 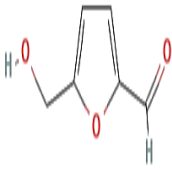   |
| 07 | Tetratetracontane          | $C_{44}H_{90}$  |        | 7.82  | 0.25 | 23494   |    |
| 08 | Pentadecanal               | $C_{15}H_{30}O$ | 226.40 | 10.38 | 0.06 | 17697   |    |
| 09 | Phytol                     | $C_{20}H_{40}O$ |        | 33.82 | 0.13 | 5280435 |  |
| 10 | Octacosane                 | $C_{28}H_{58}$  | 394.77 | 8.15  | 0.37 | 12408   |  |
| 11 | 7-hexadecyne               | $C_{16}H_{30}$  | 222.42 | 4.21  | 0.06 | 549042  |  |

|    |                 |                      |        |       |      |         |                                                                                       |
|----|-----------------|----------------------|--------|-------|------|---------|---------------------------------------------------------------------------------------|
| 12 | Lupeol          | $C_{30}H_{50}O$      | 426.73 | 12.12 | 0.78 | 259648  | 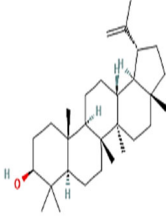   |
| 13 | Dichloromethane | $CH_2Cl_2$           | 84.93  | 7.57  | 0.00 | 6344    |    |
| 14 | Kaempferol      | $C_{15}H_{10}O_6$    | 286.24 | 41.88 | 0.24 | 5280863 |    |
| 15 | Procyanidin B2  | $C_{30}H_{26}O_{12}$ | 578.53 | 3.01  | 0.66 | 122738  |  |
| 16 | Biochanin A     | $C_{16}H_{12}O_5$    | 284.27 | 25.21 | 0.24 | 5280373 |  |
| 17 | Licoisoflavone  | $C_{20}H_{18}O_6$    | 354.36 | 41.61 | 0.42 | 5281789 |  |

|    |                |                                                 |        |       |      |         |                                                                                       |
|----|----------------|-------------------------------------------------|--------|-------|------|---------|---------------------------------------------------------------------------------------|
| 18 | Amentoflavone  | C <sub>30</sub> H <sub>18</sub> O <sub>10</sub> | 538.46 | 2.95  | 0.65 | 5281600 | 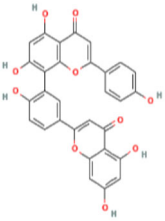   |
| 19 | Chrysophanol   | C <sub>15</sub> H <sub>10</sub> O <sub>4</sub>  | 254.24 | 18.64 | 0.21 | 10208   |    |
| 20 | Rhein          | C <sub>15</sub> H <sub>8</sub> O <sub>6</sub>   | 284.22 | 47.07 | 0.28 | 10168   |    |
| 21 | Ellagic Acid   | C <sub>14</sub> H <sub>6</sub> O <sub>8</sub>   | 302.19 | 43.06 | 0.43 | 5281855 |  |
| 22 | Quercetin      | C <sub>15</sub> H <sub>10</sub> O <sub>7</sub>  | 302.23 | 46.43 | 0.28 | 5280343 |  |
| 23 | Gibberellin A3 | C <sub>19</sub> H <sub>22</sub> O <sub>6</sub>  | 346.4  | 81.59 | 0.53 | 6466    |  |

|    |                     |                                                |        |       |      |         |                                                                                       |
|----|---------------------|------------------------------------------------|--------|-------|------|---------|---------------------------------------------------------------------------------------|
| 24 | $\beta$ -Sitosterol | C <sub>29</sub> H <sub>50</sub> O              | 414.7  | 36.91 | 0.75 | 222284  | 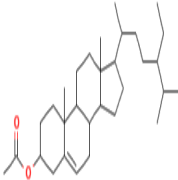   |
| 25 | Stigmasterol        | C <sub>29</sub> H <sub>48</sub> O              | 412.7  | 43.83 | 0.76 | 5280794 |    |
| 26 | Emodin              | C <sub>15</sub> H <sub>10</sub> O <sub>5</sub> | 270.24 | 24.40 | 0.24 | 3220    |    |
| 27 | Physcion            | C <sub>16</sub> H <sub>12</sub> O <sub>5</sub> | 284.27 | 22.29 | 0.27 | 10639   |  |
| 28 | Citreorosein        | C <sub>15</sub> H <sub>10</sub> O <sub>6</sub> | 286.24 | 22.19 | 0.27 | 361512  |  |
| 29 | Ziganein            | C <sub>15</sub> H <sub>10</sub> O <sub>4</sub> | 254.24 | 18.92 | 0.21 | 5316800 |  |

|    |               |                      |        |       |      |         |                                                                                       |
|----|---------------|----------------------|--------|-------|------|---------|---------------------------------------------------------------------------------------|
| 30 | Sennoside A   | $C_{42}H_{38}O_{20}$ | 862.75 | 3.34  | 0.08 | 73111   | 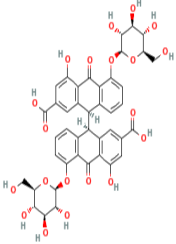   |
| 31 | Sennoside B   | $C_{42}H_{38}O_{20}$ | 862.75 | 3.34  | 0.08 | 91440   |    |
| 32 | Isoscopoletin | $C_{10}H_8O_4$       | 192.17 | 23.46 | 0.08 | 69894   |    |
| 33 | Scopoletin    | $C_{10}H_8O_4$       | 192.17 | 27.77 | 0.08 | 5280460 |  |
| 34 | Esculetin     | $C_9H_6O_4$          | 178.14 | 22.97 | 0.07 | 5281416 |  |
| 35 | Cherianoine   | $C_{12}H_{13}NO_4$   | 235.24 | 27.32 | 0.12 | 5315819 |  |

|    |                  |                   |        |       |      |         |                                                                                       |
|----|------------------|-------------------|--------|-------|------|---------|---------------------------------------------------------------------------------------|
| 36 | Isovanillic acid | $C_8H_8O_4$       | 168.15 | 39.42 | 0.04 | 12575   | 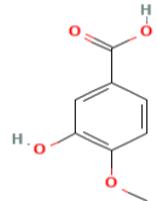   |
| 37 | Vanillic acid    | $C_8H_8O_4$       | 168.15 | 35.47 | 0.04 | 8468    |    |
| 38 | Clerosterol      | $C_{29}H_{48}O$   | 412.7  | 7.56  | 0.76 | 5283638 |    |
| 39 | Stearic acid     | $C_{18}H_{36}O_2$ | 284.48 | 17.83 | 0.14 | 5281    |  |
| 40 | Oleic acid       | $C_{18}H_{34}O_2$ | 282.47 | 33.13 | 0.14 | 445639  |  |
| 41 | Linoleic acid    | $C_{18}H_{32}O_2$ | 280.45 | 41.90 | 0.14 | 5280450 |  |



|    |                        |                   |        |       |      |         |                                                                                       |
|----|------------------------|-------------------|--------|-------|------|---------|---------------------------------------------------------------------------------------|
| 42 | Lutein                 | $C_{40}H_{56}O_2$ | 568.89 | 22.59 | 0.55 | 5281243 | 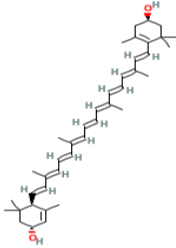   |
| 43 | Pyruvic acid           | $C_3H_4O_3$       | 88.06  | 54.46 | 0.01 | 1060    |    |
| 44 | Valeric acid           | $C_5H_{10}O_2$    | 102.13 | 70.74 | 0.01 | 7991    |    |
| 45 | Scopolin               | $C_{16}H_{18}O_9$ | 354.31 | 25.50 | 0.39 | 439514  |  |
| 46 | Uridine                | $C_9H_{12}N_2O_6$ | 244.2  | 10.49 | 0.11 | 6029    |  |
| 47 | 1H-indole-3-ethanamine | $C_{10}H_{12}N_2$ | 160.22 | 32.08 | 0.05 | 1150    |  |

|    |                       |                   |        |       |      |        |                                                                                       |
|----|-----------------------|-------------------|--------|-------|------|--------|---------------------------------------------------------------------------------------|
| 48 | L-Norvaline           | $C_5H_{11}NO_2$   | 117.15 | 75.82 | 0.01 | 65098  | 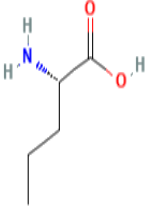   |
| 49 | Benzenepropanoic acid | $C_9H_{10}O_2$    | 150.18 | 35.83 | 0.03 | 107    |    |
| 50 | n-Cetane              | $C_{16}H_{34}$    | 226.45 | 12.32 | 0.06 | 11006  |    |
| 51 | Octadecane            | $C_{18}H_{38}$    | 254.5  | 9.81  | 0.09 | 11635  |  |
| 52 | Cumin aldehyde        | $C_{10}H_{12}O$   | 148.2  | 38.29 | 0.03 | 326    |  |
| 53 | Aromadendrin          | $C_{15}H_{12}O_6$ | 288.25 | 23.04 | 0.24 | 122850 |  |

|    |                                  |                                                 |        |       |      |         |                                                                                       |
|----|----------------------------------|-------------------------------------------------|--------|-------|------|---------|---------------------------------------------------------------------------------------|
| 54 | Epicatechin                      | C <sub>15</sub> H <sub>14</sub> O <sub>6</sub>  | 290.27 | 28.93 | 0.24 | 72276   | 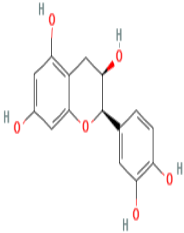   |
| 55 | Caffeic Acid                     | C <sub>9</sub> H <sub>8</sub> O <sub>4</sub>    | 180.16 | 25.76 | 0.05 | 689043  |    |
| 56 | Rutin                            | C <sub>27</sub> H <sub>30</sub> O <sub>16</sub> | 610.52 | 3.20  | 0.68 | 5280805 |   |
| 57 | Eriodictyol-7-O-neohesperidoside | C <sub>27</sub> H <sub>32</sub> O <sub>15</sub> | 596.54 | 3.93  | 0.73 | 114627  |  |
| 58 | Triacontane                      | C <sub>33</sub> H <sub>68</sub>                 | 422.83 | 8.09  | 0.41 | 12535   |  |
| 59 | Chrysophanein                    | C <sub>21</sub> H <sub>20</sub> O <sub>9</sub>  | 416.38 | 20.06 | 0.76 | 6324923 |  |

|    |                 |                   |        |       |      |         |                                                                                       |
|----|-----------------|-------------------|--------|-------|------|---------|---------------------------------------------------------------------------------------|
| 60 | 16-Heptadecenal | $C_{17}H_{32}O$   | 252.44 | 28.87 | 0.10 | 557525  |    |
| 61 | Ceryl Alcohol   | $C_{26}H_{54}O$   | 382.72 | 10.95 | 0.35 | 68171   |    |
| 62 | Sweroside       | $C_{16}H_{22}O_9$ | 358.34 | 4.96  | 0.38 | 161036  |    |
| 63 | Umbelliferone   | $C_9H_6O_3$       | 162.14 | 27.37 | 0.05 | 5281426 |  |
| 64 | Nonacosane      | $C_{29}H_{60}$    | 408.8  | 8.12  | 0.39 | 12409   |  |
| 65 | Rubiadin        | $C_{15}H_{10}O_4$ | 254.24 | 25.02 | 0.21 | 124062  |  |

|    |                    |                      |        |       |      |        |                                                                                       |
|----|--------------------|----------------------|--------|-------|------|--------|---------------------------------------------------------------------------------------|
| 66 | Heptacosanoic Acid | $C_{27}H_{54}O_2$    | 410.73 | 13.96 | 0.44 | 23524  |    |
| 67 | Malvalic acid      | $C_{18}H_{32}O_2$    | 280.45 | 30.99 | 0.15 | 10416  |    |
| 68 | Galactomannan      | $C_{18}H_{32}O_{16}$ | 504.44 | 10.92 | 0.70 | 439336 |    |
| 69 | Oxalic Acid        | $C_2H_2O_4$          | 90.03  | 29.68 | 0.01 | 971    |  |
| 70 | Sterculic acid     | $C_{19}H_{34}O_2$    | 294.48 | 29.77 | 0.18 | 12921  |  |
| 71 | Myristic acid      | $C_{14}H_{28}O_2$    | 228.38 | 21.18 | 0.07 | 11005  |  |

|    |                   |                   |        |       |      |        |                                                                                       |
|----|-------------------|-------------------|--------|-------|------|--------|---------------------------------------------------------------------------------------|
| 72 | Gallic Acid       | $C_7H_6O_5$       | 170.12 | 31.69 | 0.04 | 370    | 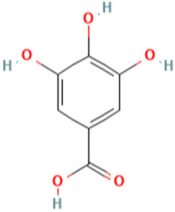   |
| 73 | Pectin            | $C_6H_{10}O_7$    | 194.14 | 40.39 | 0.06 | 441476 |    |
| 74 | Dihydrokaempferol | $C_{15}H_{12}O_6$ | 288.25 | 23.04 | 0.24 | 122850 |    |
| 75 | Butyric Acid      | $C_4H_8O_2$       | 88.11  | 21.62 | 0.00 | 264    |  |
| 76 | Caprylic acid     | $C_8H_{16}O_2$    | 144.21 | 16.40 | 0.02 | 379    |  |
| 77 | Formic acid       | $CH_2O_2$         | 46.03  | 33.26 | 0.00 | 284    |  |

78 Aloin C<sub>21</sub>H<sub>22</sub>O<sub>9</sub> 418.4 11.80 0.71 12305761

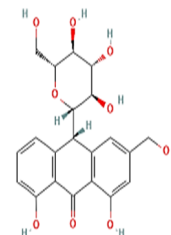

**Table S2.** The unique genes and variants of EOC fetched from DisGeNET & Genecards databases.

| Sr. No. | Gene      | Gene name                                                             | Protein class              | Gene ID |
|---------|-----------|-----------------------------------------------------------------------|----------------------------|---------|
| 1       | MMP2      | matrix metalloproteinase 2                                            | Enzyme                     | 4313    |
| 2       | EDN1      | endothelin 1                                                          | Signaling                  | 1906    |
| 3       | CXCR4     | C-X-C motif chemokine receptor 4                                      | G-protein coupled receptor | 7852    |
| 4       | MIR20A    | microRNA 20a                                                          |                            | 406982  |
| 5       | MIRLET7G  | microRNA let-7g                                                       |                            | 406890  |
| 6       | MMP7      | matrix metalloproteinase 7                                            | Enzyme                     | 4316    |
| 7       | ZEB1      | zinc finger E-box binding homeobox 1                                  | Transcription factor       | 6935    |
| 8       | CDK14     | cyclin dependent kinase 14                                            | Kinase                     | 5218    |
| 9       | SOD2      | superoxide dismutase 2                                                | Enzyme                     | 6648    |
| 10      | SEMA4D    | semaphorin 4D                                                         | Signaling                  | 10507   |
| 11      | MIR200B   | microRNA 200b                                                         |                            | 406984  |
| 12      | BRCA1     | BRCA1 DNA repair associated                                           | Enzyme                     | 672     |
| 13      | LINC00460 | long intergenic non-protein coding RNA 460                            |                            | 728192  |
| 14      | TEK       | TEK receptor tyrosine kinase                                          | Kinase                     | 7010    |
| 15      | MIR630    | microRNA 630                                                          |                            | 693215  |
| 16      | PDCD4     | programmed cell death 4                                               | Nucleic acid binding       | 27250   |
| 17      | FOXP3     | forkhead box P3                                                       |                            | 50943   |
| 18      | SMYD3     | SET and MYND domain containing 3                                      | Epigenetic regulator       | 64754   |
| 19      | ROR2      | receptor tyrosine kinase like orphan receptor 2                       | Kinase                     | 4920    |
| 20      | FOXM1     | forkhead box M1                                                       |                            | 2305    |
| 21      | CDK1      | cyclin dependent kinase 1                                             | Kinase                     | 983     |
| 22      | PLXNA1    | plexin A1                                                             |                            | 5361    |
| 23      | CD82      | CD82 molecule                                                         |                            | 3732    |
| 24      | MIR193A   | microRNA 193a                                                         |                            | 406968  |
| 25      | ID1       | inhibitor of DNA binding 1, HLH protein                               | Transcription factor       | 3397    |
| 26      | PIK3CB    | phosphatidylinositol-4,5-bisphosphate 3-kinase catalytic subunit beta | Kinase                     | 5291    |
| 27      | COL18A1   | collagen type XVIII alpha 1 chain                                     |                            | 80781   |
| 28      | ASS1      | argininosuccinate synthase 1                                          | Enzyme                     | 445     |
| 29      | RGS4      | regulator of G protein signaling 4                                    | Enzyme modulator           | 5999    |
| 30      | ADAM23    | ADAM metalloproteinase domain 23                                      | Enzyme                     | 8745    |
| 31      | CYP1A1    | cytochrome P450 family 1 subfamily A member 1                         | Enzyme                     | 1543    |
| 32      | KDM4B     | lysine demethylase 4B                                                 | Epigenetic regulator       | 23030   |

|    |           |                                                             |                            |          |
|----|-----------|-------------------------------------------------------------|----------------------------|----------|
| 33 | GSTP1     | glutathione S-transferase pi 1                              |                            | 2950     |
| 34 | MIR122    | microRNA 122                                                |                            | 406906   |
| 35 | ADRA1A    | adrenoceptor alpha 1A                                       | G-protein coupled receptor | 148      |
| 36 | MIR206    | microRNA 206                                                |                            | 406989   |
| 37 | BST1      | bone marrow stromal cell antigen 1                          | Enzyme                     | 683      |
| 38 | KISS1R    | KISS1 receptor                                              | G-protein coupled receptor | 84634    |
| 39 | IL18BP    | interleukin 18 binding protein                              |                            | 10068    |
| 40 | MAD2L1    | mitotic arrest deficient 2 like 1                           |                            | 4085     |
| 41 | DLEC1     | DLEC1 cilia and flagella associated protein                 |                            | 9940     |
| 42 | HP        | haptoglobin                                                 | Enzyme                     | 3240     |
| 43 | MIR628    | microRNA 628                                                |                            | 693213   |
| 44 | PPARGC1A  | PPARG coactivator 1 alpha                                   | Transcription factor       | 10891    |
| 45 | LGALS7B   | galectin 7B                                                 |                            | 653499   |
| 46 | IL17D     | interleukin 17D                                             |                            | 53342    |
| 47 | LIN28B    | lin-28 homolog B                                            |                            | 389421   |
| 48 | LDLR      | low density lipoprotein receptor                            |                            | 3949     |
| 49 | RCAN1     | regulator of calcineurin 1                                  | Signaling                  | 1827     |
| 50 | HSPA2     | heat shock protein family A (Hsp70) member 2                |                            | 3306     |
| 51 | LGR5      | leucine rich repeat containing G protein-coupled receptor 5 | G-protein coupled receptor | 8549     |
| 52 | JAK2      | Janus kinase 2                                              | Kinase                     | 3717     |
| 53 | XAF1      | XIAP associated factor 1                                    |                            | 54739    |
| 54 | B2M       | beta-2-microglobulin                                        | Immune response            | 567      |
| 55 | KMT5A     | lysine methyltransferase 5A                                 |                            | 387893   |
| 56 | EIF5A     | eukaryotic translation initiation factor 5A                 | Nucleic acid binding       | 1984     |
| 57 | MIR221    | microRNA 221                                                |                            | 407006   |
| 58 | E2F4      | E2F transcription factor 4                                  | Nucleic acid binding       | 1874     |
| 59 | CLDN10    | claudin 10                                                  | Cell-cell junction         | 9071     |
| 60 | TYMS      | thymidylate synthetase                                      | Enzyme                     | 7298     |
| 61 | ZFAS1     | ZNFX1 antisense RNA 1                                       |                            | 441951   |
| 62 | SNCA      | synuclein alpha                                             | Transporter                | 6622     |
| 63 | HRAS      | HRas proto-oncogene, GTPase                                 | Enzyme modulator           | 3265     |
| 64 | FOLR2     | folate receptor beta                                        |                            | 2350     |
| 65 | CDKN2B    | cyclin dependent kinase inhibitor 2B                        |                            | 1030     |
| 66 | VAT1      | vesicle amine transport 1                                   |                            | 10493    |
| 67 | SOCS3     | suppressor of cytokine signaling 3                          | Enzyme modulator           | 9021     |
| 68 | KIF1B     | kinesin family member 1B                                    | Cellular structure         | 23095    |
| 69 | MBD2      | methyl-CpG binding domain protein 2                         | Epigenetic regulator       | 8932     |
| 70 | FOXO1     | forkhead box O1                                             |                            | 2308     |
| 71 | MAGI2-AS3 | MAGI2 antisense RNA 3                                       |                            | 1.01E+08 |
| 72 | CKS2      | CDC28 protein kinase regulatory subunit 2                   | Enzyme modulator           | 1164     |
| 73 | RPS6KA2   | ribosomal protein S6 kinase A2                              | Kinase                     | 6196     |
| 74 | MIR152    | microRNA 152                                                |                            | 406943   |
| 75 | FPR1      | formyl peptide receptor 1                                   | G-protein coupled          | 2357     |



|     |         |                                                                 |                            |        |
|-----|---------|-----------------------------------------------------------------|----------------------------|--------|
|     |         |                                                                 | receptor                   |        |
| 76  | ADGRG1  | adhesion G protein-coupled receptor G1                          | G-protein coupled receptor | 9289   |
| 77  | ANXA2   | annexin A2                                                      |                            | 302    |
| 78  | PDCD6   | programmed cell death 6                                         |                            | 10016  |
| 79  | PRKN    | parkin RBR E3 ubiquitin protein ligase                          | Enzyme                     | 5071   |
| 80  | F2RL2   | coagulation factor II thrombin receptor like 2                  | G-protein coupled receptor | 2151   |
| 81  | LPAR3   | lysophosphatidic acid receptor 3                                | G-protein coupled receptor | 23566  |
| 82  | SLC31A1 | solute carrier family 31 member 1                               | Transporter                | 1317   |
| 83  | ST7L    | suppression of tumorigenicity 7 like                            |                            | 54879  |
| 84  | IL10    | interleukin 10                                                  |                            | 3586   |
| 85  | PRMT5   | protein arginine methyltransferase 5                            | Epigenetic regulator       | 10419  |
| 86  | CLIC4   | chloride intracellular channel 4                                | Ion channel                | 25932  |
| 87  | KLK7    | kallikrein related peptidase 7                                  | Enzyme                     | 5650   |
| 88  | MDM2    | MDM2 proto-oncogene                                             | Nucleic acid binding       | 4193   |
| 89  | NLK     | nemo like kinase                                                | Kinase                     | 51701  |
| 90  | SNHG15  | small nucleolar RNA host gene 15                                |                            | 285958 |
| 91  | CLDN3   | claudin 3                                                       | Cell-cell junction         | 1365   |
| 92  | AKT2    | AKT serine/threonine kinase 2                                   | Kinase                     | 208    |
| 93  | EGFR    | epidermal growth factor receptor                                | Kinase                     | 1956   |
| 94  | GALNT6  | polypeptide N-acetylgalactosaminyltransferase 6                 | Enzyme                     | 11226  |
| 95  | MIR130A | microRNA 130a                                                   |                            | 406919 |
| 96  | PCGEM1  | PCGEM1 prostate-specific transcript                             |                            | 64002  |
| 97  | ERBB2   | erb-b2 receptor tyrosine kinase 2                               | Kinase                     | 2064   |
| 98  | LGALS3  | galectin 3                                                      | Signaling                  | 3958   |
| 99  | TMPRSS3 | transmembrane serine protease 3                                 | Enzyme                     | 64699  |
| 100 | SOHLH2  | spermatogenesis and oogenesis specific basic helix-loop-helix 2 |                            | 54937  |
| 101 | MIR936  | microRNA 936                                                    |                            | 1E+08  |
| 102 | AKAP3   | A-kinase anchoring protein 3                                    |                            | 10566  |
| 103 | TBL1XR1 | TBL1X receptor 1                                                |                            | 79718  |
| 104 | TACSTD2 | tumor associated calcium signal transducer 2                    |                            | 4070   |
| 105 | NRG3    | neuregulin 3                                                    | Signaling                  | 10718  |
| 106 | F10     | coagulation factor X                                            | Enzyme                     | 2159   |
| 107 | SRGAP1  | SLIT-ROBO Rho GTPase activating protein 1                       | Enzyme modulator           | 57522  |
| 108 | CCNE2   | cyclin E2                                                       | Enzyme modulator           | 9134   |
| 109 | ABHD8   | abhydrolase domain containing 8                                 |                            | 79575  |
| 110 | RAD50   | RAD50 double strand break repair protein                        |                            | 10111  |
| 111 | SYNE1   | spectrin repeat containing nuclear envelope protein 1           |                            | 23345  |
| 112 | ADH4    | alcohol dehydrogenase 4 (class II), pi polypeptide              | Enzyme                     | 127    |
| 113 | HTRA1   | HtrA serine peptidase 1                                         | Enzyme                     | 5654   |
| 114 | RAB22A  | RAB22A, member RAS oncogene family                              |                            | 57403  |

|     |          |                                                           |                            |        |
|-----|----------|-----------------------------------------------------------|----------------------------|--------|
| 115 | EN2      | engrailed homeobox 2                                      | Transcription factor       | 2020   |
| 116 | RUNX2    | RUNX family transcription factor 2                        | Transcription factor       | 860    |
| 117 | PGR      | progesterone receptor                                     | Nuclear receptor           | 5241   |
| 118 | NR2F6    | nuclear receptor subfamily 2 group F member 6             | Nuclear receptor           | 2063   |
| 119 | MIR22    | microRNA 22                                               |                            | 407004 |
| 120 | BRMS1L   | BRMS1 like transcriptional repressor                      |                            | 84312  |
| 121 | ITCH     | itchy E3 ubiquitin protein ligase                         | Enzyme                     | 83737  |
| 122 | TET1     | tet methylcytosine dioxygenase 1                          |                            | 80312  |
| 123 | DMD      | dystrophin                                                |                            | 1756   |
| 124 | IGFBP3   | insulin like growth factor binding protein 3              | Enzyme modulator           | 3486   |
| 125 | DEK      | DEK proto-oncogene                                        |                            | 7913   |
| 126 | ARHGAP24 | Rho GTPase activating protein 24                          |                            | 83478  |
| 127 | C4BPA    | complement component 4 binding protein alpha              |                            | 722    |
| 128 | ALB      | albumin                                                   | Transporter                | 213    |
| 129 | ACTBL2   | actin beta like 2                                         |                            | 345651 |
| 130 | HLA-C    | major histocompatibility complex, class I, C              |                            | 3107   |
| 131 | FZD4     | frizzled class receptor 4                                 | G-protein coupled receptor | 8322   |
| 132 | CASP4    | caspase 4                                                 | Enzyme                     | 837    |
| 133 | MCPH1    | microcephalin 1                                           | Nucleic acid binding       | 79648  |
| 134 | TWIST1   | twist family bHLH transcription factor 1                  | Transcription factor       | 7291   |
| 135 | MIR509-1 | microRNA 509-1                                            |                            | 574514 |
| 136 | TYMP     | thymidine phosphorylase                                   | Enzyme                     | 1890   |
| 137 | SAFB     | scaffold attachment factor B                              |                            | 6294   |
| 138 | XRCC2    | X-ray repair cross complementing 2                        |                            | 7516   |
| 139 | MMS19    | MMS19 homolog, cytosolic iron-sulfur assembly component   | Transcription factor       | 64210  |
| 140 | ERBB4    | erb-b2 receptor tyrosine kinase 4                         | Kinase                     | 2066   |
| 141 | UGCG     | UDP-glucose ceramide glucosyltransferase                  | Enzyme                     | 7357   |
| 142 | EIF6     | eukaryotic translation initiation factor 6                | Nucleic acid binding       | 3692   |
| 143 | MIR146A  | microRNA 146a                                             |                            | 406938 |
| 144 | KIF7     | kinesin family member 7                                   |                            | 374654 |
| 145 | RAD51B   | RAD51 paralog B                                           |                            | 5890   |
| 146 | MIR149   | microRNA 149                                              |                            | 406941 |
| 147 | CD55     | CD55 molecule (Cromer blood group)                        |                            | 1604   |
| 148 | LNPEP    | leucyl and cystinyl aminopeptidase                        | Enzyme                     | 4012   |
| 149 | MIR148A  | microRNA 148a                                             |                            | 406940 |
| 150 | KRT13    | keratin 13                                                |                            | 3860   |
| 151 | MIR204   | microRNA 204                                              |                            | 406987 |
| 152 | EZH2     | enhancer of zeste 2 polycomb repressive complex 2 subunit | Epigenetic regulator       | 2146   |
| 153 | MIR127   | microRNA 127                                              |                            | 406914 |
| 154 | PON1     | paraoxonase 1                                             |                            | 5444   |
| 155 | HBEGF    | heparin binding EGF like growth factor                    | Signaling                  | 1839   |
| 156 | MIR223   | microRNA 223                                              |                            | 407008 |
| 157 | TIPARP   | TCDD inducible poly(ADP-ribose) polymerase                |                            | 25976  |

|     |          |                                                            |                      |        |
|-----|----------|------------------------------------------------------------|----------------------|--------|
| 158 | MIR502   | microRNA 502                                               |                      | 574504 |
| 159 | CKB      | creatine kinase B                                          | Kinase               | 1152   |
| 160 | GOLPH3   | golgi phosphoprotein 3                                     |                      | 64083  |
| 161 | URI1     | URI1 prefoldin like chaperone                              | Transcription factor | 8725   |
| 162 | CD40     | CD40 molecule                                              |                      | 958    |
| 163 | MIR23A   | microRNA 23a                                               |                      | 407010 |
| 164 | IGFBP7   | insulin like growth factor binding protein 7               |                      | 3490   |
| 165 | MAL      | mal, T cell differentiation protein                        | Transporter          | 4118   |
| 166 | KIFC1    | kinesin family member C1                                   | Cellular structure   | 3833   |
| 167 | ALDH1A2  | aldehyde dehydrogenase 1 family member A2                  | Enzyme               | 8854   |
| 168 | MIR574   | microRNA 574                                               |                      | 693159 |
| 169 | EGR1     | early growth response 1                                    | Nucleic acid binding | 1958   |
| 170 | ABCB1    | ATP binding cassette subfamily B member 1                  | Transporter          | 5243   |
| 171 | KLF6     | Kruppel like factor 6                                      | Nucleic acid binding | 1316   |
| 172 | THBD     | thrombomodulin                                             |                      | 7056   |
| 173 | UBR5     | ubiquitin protein ligase E3 component n-recognin 5         |                      | 51366  |
| 174 | MAPK14   | mitogen-activated protein kinase 14                        | Kinase               | 1432   |
| 175 | SERPINB2 | serpin family B member 2                                   | Enzyme modulator     | 5055   |
| 176 | MIR106B  | microRNA 106b                                              |                      | 406900 |
| 177 | CD226    | CD226 molecule                                             |                      | 10666  |
| 178 | STAT3    | signal transducer and activator of transcription 3         | Nucleic acid binding | 6774   |
| 179 | MAD1L1   | mitotic arrest deficient 1 like 1                          |                      | 8379   |
| 180 | CAP1     | cyclase associated actin cytoskeleton regulatory protein 1 | Cellular structure   | 10487  |
| 181 | HSPA1A   | heat shock protein family A (Hsp70) member 1A              |                      | 3303   |
| 182 | ARRB1    | arrestin beta 1                                            | Enzyme modulator     | 408    |
| 183 | DAPK2    | death associated protein kinase 2                          | Kinase               | 23604  |
| 184 | CENPA    | centromere protein A                                       |                      | 1058   |
| 185 | MCAM     | melanoma cell adhesion molecule                            | Cell adhesion        | 4162   |
| 186 | SFN      | stratifin                                                  | Chaperone            | 2810   |
| 187 | TMED2    | transmembrane p24 trafficking protein 2                    | Transporter          | 10959  |
| 188 | ANG      | angiogenin                                                 |                      | 283    |
| 189 | CASC2    | cancer susceptibility 2                                    |                      | 255082 |
| 190 | KEAP1    | kelch like ECH associated protein 1                        |                      | 9817   |
| 191 | HOXA7    | homeobox A7                                                | Transcription factor | 3204   |
| 192 | SERPIND1 | serpin family D member 1                                   | Enzyme modulator     | 3053   |
| 193 | MARCHF7  | membrane associated ring-CH-type finger 7                  |                      | 64844  |
| 194 | IL27     | interleukin 27                                             |                      | 246778 |
| 195 | KLK15    | kallikrein related peptidase 15                            | Enzyme               | 55554  |
| 196 | GABPA    | GA binding protein transcription factor subunit alpha      | Transcription factor | 2551   |
| 197 | CASP3    | caspase 3                                                  | Enzyme               | 836    |
| 198 | ITGAM    | integrin subunit alpha M                                   |                      | 3684   |
| 199 | DIRAS3   | DIRAS family GTPase 3                                      | Enzyme modulator     | 9077   |
| 200 | SNHG20   | small nucleolar RNA host gene 20                           |                      | 654434 |

|     |              |                                                         |                            |          |
|-----|--------------|---------------------------------------------------------|----------------------------|----------|
| 201 | PECAM1       | platelet and endothelial cell adhesion molecule 1       | Cell adhesion              | 5175     |
| 202 | LOC110806263 | TERT 5' regulatory region                               |                            | 1.11E+08 |
| 203 | SKAP1        | src kinase associated phosphoprotein 1                  |                            | 8631     |
| 204 | DSC3         | desmocollin 3                                           | Cell adhesion              | 1825     |
| 205 | LHCGR        | luteinizing hormone/choriogonadotropin receptor         | G-protein coupled receptor | 3973     |
| 206 | CCR1         | C-C motif chemokine receptor 1                          | G-protein coupled receptor | 1230     |
| 207 | DUSP6        | dual specificity phosphatase 6                          |                            | 1848     |
| 208 | ELK1         | ETS transcription factor ELK1                           | Transcription factor       | 2002     |
| 209 | LGMN         | legumain                                                | Enzyme                     | 5641     |
| 210 | LILRB1       | leukocyte immunoglobulin like receptor B1               | Receptor                   | 10859    |
| 211 | NFIX         | nuclear factor I X                                      | Nucleic acid binding       | 4784     |
| 212 | CLEC14A      | C-type lectin domain containing 14A                     |                            | 161198   |
| 213 | LPA          | lipoprotein(a)                                          | Enzyme                     | 4018     |
| 214 | LY75         | lymphocyte antigen 75                                   |                            | 4065     |
| 215 | NQO1         | NAD(P)H quinone dehydrogenase 1                         |                            | 1728     |
| 216 | SP1          | Sp1 transcription factor                                | Nucleic acid binding       | 6667     |
| 217 | GTF2F1       | general transcription factor IIF subunit 1              | Nucleic acid binding       | 2962     |
| 218 | IGFBP1       | insulin like growth factor binding protein 1            | Enzyme modulator           | 3484     |
| 219 | IFNG         | interferon gamma                                        |                            | 3458     |
| 220 | HTATIP2      | HIV-1 Tat interactive protein 2                         |                            | 10553    |
| 221 | FGF2         | fibroblast growth factor 2                              | Signaling                  | 2247     |
| 222 | ING4         | inhibitor of growth family member 4                     | Nucleic acid binding       | 51147    |
| 223 | RRM2         | ribonucleotide reductase regulatory subunit M2          | Enzyme                     | 6241     |
| 224 | MRE11        | MRE11 homolog, double strand break repair nuclease      |                            | 4361     |
| 225 | MIR429       | microRNA 429                                            |                            | 554210   |
| 226 | KLRC4-KLRK1  | KLRC4-KLRK1 readthrough                                 |                            | 1.01E+08 |
| 227 | KLK5         | kallikrein related peptidase 5                          | Enzyme                     | 25818    |
| 228 | NOB1         | NIN1 (RPN12) binding protein 1 homolog                  |                            | 28987    |
| 229 | TSG101       | tumor susceptibility 101                                | Enzyme                     | 7251     |
| 230 | TNFRSF1B     | TNF receptor superfamily member 1B                      |                            | 7133     |
| 231 | CXCL1        | C-X-C motif chemokine ligand 1                          | Signaling                  | 2919     |
| 232 | PAX8         | paired box 8                                            |                            | 7849     |
| 233 | PRDX2        | peroxiredoxin 2                                         | Enzyme                     | 7001     |
| 234 | CDKN1C       | cyclin dependent kinase inhibitor 1C                    |                            | 1028     |
| 235 | RBMS3        | RNA binding motif single stranded interacting protein 3 |                            | 27303    |
| 236 | TGFBR2       | transforming growth factor beta receptor 2              | Kinase                     | 7048     |
| 237 | IL33         | interleukin 33                                          |                            | 90865    |
| 238 | MSLN         | mesothelin                                              | Extracellular structure    | 10232    |
| 239 | WWTR1        | WW domain containing transcription regulator 1          | Enzyme modulator           | 25937    |

|     |           |                                                           |                            |        |
|-----|-----------|-----------------------------------------------------------|----------------------------|--------|
| 240 | CIB1      | calcium and integrin binding 1                            |                            | 10519  |
| 241 | SETD7     | SET domain containing 7, histone lysine methyltransferase | Epigenetic regulator       | 80854  |
| 242 | MIRLET7A3 | microRNA let-7a-3                                         |                            | 406883 |
| 243 | VEGFD     | vascular endothelial growth factor D                      | Signaling                  | 2277   |
| 244 | HDGF      | heparin binding growth factor                             | Signaling                  | 3068   |
| 245 | PRAME     | preferentially expressed antigen in melanoma              |                            | 23532  |
| 246 | TRIM59    | tripartite motif containing 59                            |                            | 286827 |
| 247 | PPA1      | inorganic pyrophosphatase 1                               | Enzyme                     | 5464   |
| 248 | NOTCH3    | notch receptor 3                                          |                            | 4854   |
| 249 | CDKN3     | cyclin dependent kinase inhibitor 3                       |                            | 1033   |
| 250 | SFRP1     | secreted frizzled related protein 1                       |                            | 6422   |
| 251 | RASSF1    | Ras association domain family member 1                    | Enzyme modulator           | 11186  |
| 252 | HOTTIP    | HOXA distal transcript antisense RNA                      |                            | 1E+08  |
| 253 | BTG3      | BTG anti-proliferation factor 3                           |                            | 10950  |
| 254 | FBLN5     | fibulin 5                                                 | Calcium-binding protein    | 10516  |
| 255 | MIR490    | microRNA 490                                              |                            | 574443 |
| 256 | PMS2      | PMS1 homolog 2, mismatch repair system component          | Nucleic acid binding       | 5395   |
| 257 | HELQ      | helicase, POLQ like                                       |                            | 113510 |
| 258 | HOXB-AS3  | HOXB cluster antisense RNA 3                              |                            | 404266 |
| 259 | WASF1     | WASP family member 1                                      | Cellular structure         | 8936   |
| 260 | HSPB1     | heat shock protein family B (small) member 1              |                            | 3315   |
| 261 | IGF1      | insulin like growth factor 1                              |                            | 3479   |
| 262 | GDF15     | growth differentiation factor 15                          | Signaling                  | 9518   |
| 263 | MIR545    | microRNA 545                                              |                            | 664614 |
| 264 | DKK2      | dickkopf WNT signaling pathway inhibitor 2                |                            | 27123  |
| 265 | ZIC2      | Zic family member 2                                       | Transcription factor       | 7546   |
| 266 | KPNA2     | karyopherin subunit alpha 2                               | Transporter                | 3838   |
| 267 | PDIA3     | protein disulfide isomerase family A member 3             |                            | 2923   |
| 268 | NECTIN2   | nectin cell adhesion molecule 2                           |                            | 5819   |
| 269 | GNAS      | GNAS complex locus                                        | Enzyme modulator           | 2778   |
| 270 | MIR302B   | microRNA 302b                                             |                            | 442894 |
| 271 | MIR520H   | microRNA 520h                                             |                            | 574493 |
| 272 | PIN1      | peptidylprolyl cis/trans isomerase, NIMA-interacting 1    |                            | 5300   |
| 273 | MIR99A    | microRNA 99a                                              |                            | 407055 |
| 274 | TRIM2     | tripartite motif containing 2                             | Enzyme                     | 23321  |
| 275 | HYOU1     | hypoxia up-regulated 1                                    |                            | 10525  |
| 276 | DLX6-AS1  | DLX6 antisense RNA 1                                      |                            | 285987 |
| 277 | USP7      | ubiquitin specific peptidase 7                            | Enzyme                     | 7874   |
| 278 | KL        | klotho                                                    | Enzyme                     | 9365   |
| 279 | RACGAP1   | Rac GTPase activating protein 1                           | Enzyme modulator           | 29127  |
| 280 | EDNRA     | endothelin receptor type A                                | G-protein coupled receptor | 1909   |

|     |          |                                                                             |                      |          |
|-----|----------|-----------------------------------------------------------------------------|----------------------|----------|
| 281 | ESRRA    | estrogen related receptor alpha                                             | Nuclear receptor     | 2101     |
| 282 | BAGE     | B melanoma antigen                                                          |                      | 574      |
| 283 | SLC22A16 | solute carrier family 22 member 16                                          | Transporter          | 85413    |
| 284 | CRP      | C-reactive protein                                                          |                      | 1401     |
| 285 | MED12    | mediator complex subunit 12                                                 | Transcription factor | 9968     |
| 286 | RABEP2   | rabaptin, RAB GTPase binding effector protein 2                             |                      | 79874    |
| 287 | FUBP1    | far upstream element binding protein 1                                      | Enzyme               | 8880     |
| 288 | TNFSF12  | TNF superfamily member 12                                                   |                      | 8742     |
| 289 | MIR211   | microRNA 211                                                                |                      | 406993   |
| 290 | YWHAZ    | tyrosine 3-monooxygenase/tryptophan 5-monooxygenase activation protein zeta | Chaperone            | 7534     |
| 291 | RPL10    | ribosomal protein L10                                                       | Nucleic acid binding | 6134     |
| 292 | CARD14   | caspase recruitment domain family member 14                                 |                      | 79092    |
| 293 | NCOA3    | nuclear receptor coactivator 3                                              | Kinase               | 8202     |
| 294 | CCAT1    | colon cancer associated transcript 1                                        |                      | 1.01E+08 |
| 295 | TPT1     | tumor protein, translationally-controlled 1                                 | Cellular structure   | 7178     |
| 296 | CEBPD    | CCAAT enhancer binding protein delta                                        | Transcription factor | 1052     |
| 297 | CTSB     | cathepsin B                                                                 | Enzyme               | 1508     |
| 298 | TNF      | tumor necrosis factor                                                       | Signaling            | 7124     |
| 299 | IL1A     | interleukin 1 alpha                                                         |                      | 3552     |
| 300 | PDGFD    | platelet derived growth factor D                                            | Signaling            | 80310    |
| 301 | ERCC1    | ERCC excision repair 1, endonuclease non-catalytic subunit                  | Enzyme               | 2067     |
| 302 | PAX1     | paired box 1                                                                |                      | 5075     |
| 303 | MAP1LC3B | microtubule associated protein 1 light chain 3 beta                         | Cellular structure   | 81631    |
| 304 | UCA1     | urothelial cancer associated 1                                              |                      | 652995   |
| 305 | MIR542   | microRNA 542                                                                |                      | 664617   |
| 306 | SPP1     | secreted phosphoprotein 1                                                   |                      | 6696     |
| 307 | GLI1     | GLI family zinc finger 1                                                    |                      | 2735     |
| 308 | PTGS2    | prostaglandin-endoperoxide synthase 2                                       | Enzyme               | 5743     |
| 309 | HPGDS    | hematopoietic prostaglandin D synthase                                      |                      | 27306    |
| 310 | CTSK     | cathepsin K                                                                 | Enzyme               | 1513     |
| 311 | PSIP1    | PC4 and SFRS1 interacting protein 1                                         | Signaling            | 11168    |
| 312 | BMP2     | bone morphogenetic protein 2                                                | Signaling            | 650      |
| 313 | ESR1     | estrogen receptor 1                                                         | Nuclear receptor     | 2099     |
| 314 | SST      | somatostatin                                                                | Signaling            | 6750     |
| 315 | CDK4     | cyclin dependent kinase 4                                                   | Kinase               | 1019     |
| 316 | RBM3     | RNA binding motif protein 3                                                 | Nucleic acid binding | 5935     |
| 317 | PIK3CD   | phosphatidylinositol-4,5-bisphosphate 3-kinase catalytic subunit delta      | Kinase               | 5293     |
| 318 | SLC7A11  | solute carrier family 7 member 11                                           | Transporter          | 23657    |
| 319 | SPATA2   | spermatogenesis associated 2                                                |                      | 9825     |
| 320 | WWOX     | WW domain containing oxidoreductase                                         | Enzyme               | 51741    |
| 321 | FUT8     | fucosyltransferase 8                                                        |                      | 2530     |
| 322 | STAT1    | signal transducer and activator of transcription 1                          | Nucleic acid binding | 6772     |

|     |           |                                                         |                      |          |
|-----|-----------|---------------------------------------------------------|----------------------|----------|
| 323 | CHMP4C    | charged multivesicular body protein 4C                  | Transporter          | 92421    |
| 324 | CD68      | CD68 molecule                                           | Transporter          | 968      |
| 325 | MIR338    | microRNA 338                                            |                      | 442906   |
| 326 | BSG       | basigin (Ok blood group)                                |                      | 682      |
| 327 | LINC01088 | long intergenic non-protein coding RNA 1088             |                      | 1.01E+08 |
| 328 | MIR335    | microRNA 335                                            |                      | 442904   |
| 329 | HACD1     | 3-hydroxyacyl-CoA dehydratase 1                         |                      | 9200     |
| 330 | MIR134    | microRNA 134                                            |                      | 406924   |
| 331 | CHGB      | chromogranin B                                          |                      | 1114     |
| 332 | DIAPH3    | diaphanous related formin 3                             |                      | 81624    |
| 333 | COL4A2    | collagen type IV alpha 2 chain                          |                      | 1284     |
| 334 | COL11A2   | collagen type XI alpha 2 chain                          |                      | 1302     |
| 335 | LDLRAP1   | low density lipoprotein receptor adaptor protein 1      | Signaling            | 26119    |
| 336 | ANGPTL4   | angiopoietin like 4                                     | Signaling            | 51129    |
| 337 | LGALS7    | galectin 7                                              | Signaling            | 3963     |
| 338 | MAPK1     | mitogen-activated protein kinase 1                      | Kinase               | 5594     |
| 339 | EIF3A     | eukaryotic translation initiation factor 3 subunit A    | Nucleic acid binding | 8661     |
| 340 | IKBKB     | inhibitor of nuclear factor kappa B kinase subunit beta | Kinase               | 3551     |
| 341 | DOK1      | docking protein 1                                       |                      | 1796     |
| 342 | HOXD10    | homeobox D10                                            |                      | 3236     |
| 343 | FSCN1     | fascin actin-bundling protein 1                         | Cellular structure   | 6624     |
| 344 | BRD7      | bromodomain containing 7                                | Epigenetic regulator | 29117    |
| 345 | PRSS55    | serine protease 55                                      | Enzyme               | 203074   |
| 346 | OPCML     | opioid binding protein/cell adhesion molecule like      |                      | 4978     |
| 347 | MAPK8     | mitogen-activated protein kinase 8                      | Kinase               | 5599     |
| 348 | SYTL2     | synaptotagmin like 2                                    |                      | 54843    |
| 349 | PSMB4     | proteasome 20S subunit beta 4                           |                      | 5692     |
| 350 | MIR1294   | microRNA 1294                                           |                      | 1E+08    |
| 351 | SUZ12     | SUZ12 polycomb repressive complex 2 subunit             | Nucleic acid binding | 23512    |
| 352 | MACC1     | MET transcriptional regulator MACC1                     |                      | 346389   |
| 353 | TRIM28    | tripartite motif containing 28                          |                      | 10155    |
| 354 | WFDC2     | WAP four-disulfide core domain 2                        | Enzyme modulator     | 10406    |
| 355 | MIR25     | microRNA 25                                             |                      | 407014   |
| 356 | IL1RN     | interleukin 1 receptor antagonist                       |                      | 3557     |
| 357 | ADIPOR1   | adiponectin receptor 1                                  | Receptor             | 51094    |
| 358 | CYP17A1   | cytochrome P450 family 17 subfamily A member 1          |                      | 1586     |
| 359 | CCL5      | C-C motif chemokine ligand 5                            | Signaling            | 6352     |
| 360 | MIR373    | microRNA 373                                            |                      | 442918   |
| 361 | LOX       | lysyl oxidase                                           |                      | 4015     |
| 362 | MIR455    | microRNA 455                                            |                      | 619556   |
| 363 | BAG5      | BAG cochaperone 5                                       |                      | 9529     |

|     |          |                                                              |                      |          |
|-----|----------|--------------------------------------------------------------|----------------------|----------|
| 364 | CCN1     | cellular communication network factor 1                      | Signaling            | 3491     |
| 365 | PDCD1    | programmed cell death 1                                      |                      | 5133     |
| 366 | MAP3K7   | mitogen-activated protein kinase kinase kinase 7             | Kinase               | 6885     |
| 367 | BAG4     | BAG cochaperone 4                                            |                      | 9530     |
| 368 | CAT      | catalase                                                     | Enzyme               | 847      |
| 369 | ABCA2    | ATP binding cassette subfamily A member 2                    | Transporter          | 20       |
| 370 | ADM      | adrenomedullin                                               | Signaling            | 133      |
| 371 | ANKRD30A | ankyrin repeat domain 30A                                    |                      | 91074    |
| 372 | CD47     | CD47 molecule                                                |                      | 961      |
| 373 | POU5F1   | POU class 5 homeobox 1                                       |                      | 5460     |
| 374 | NFKB1    | nuclear factor kappa B subunit 1                             | Transcription factor | 4790     |
| 375 | MUC13    | mucin 13, cell surface associated                            |                      | 56667    |
| 376 | IL21     | interleukin 21                                               |                      | 59067    |
| 377 | TUBA4B   | tubulin alpha 4b                                             | Cellular structure   | 80086    |
| 378 | GALNT1   | polypeptide N-acetylgalactosaminyltransferase 1              | Enzyme               | 2589     |
| 379 | HGFAC    | HGF activator                                                | Enzyme               | 3083     |
| 380 | EPHB2    | EPH receptor B2                                              | Kinase               | 2048     |
| 381 | HAVCR2   | hepatitis A virus cellular receptor 2                        |                      | 84868    |
| 382 | PLAUR    | plasminogen activator, urokinase receptor                    |                      | 5329     |
| 383 | NME1     | NME/NM23 nucleoside diphosphate kinase 1                     | Kinase               | 4830     |
| 384 | HGS      | hepatocyte growth factor-regulated tyrosine kinase substrate |                      | 9146     |
| 385 | SLC16A1  | solute carrier family 16 member 1                            | Transporter          | 6566     |
| 386 | PYCARD   | PYD and CARD domain containing                               | Enzyme               | 29108    |
| 387 | SOX2     | SRY-box transcription factor 2                               | Transcription factor | 6657     |
| 388 | COMT     | catechol-O-methyltransferase                                 | Enzyme               | 1312     |
| 389 | PDLIM5   | PDZ and LIM domain 5                                         | Cellular structure   | 10611    |
| 390 | LSINCT5  | long stress-induced non-coding transcript 5                  |                      | 1.01E+08 |
| 391 | SPINK1   | serine peptidase inhibitor Kazal type 1                      |                      | 6690     |
| 392 | AAVS1    | adeno-associated virus integration site 1                    |                      | 17       |
| 393 | NBN      | nibrin                                                       | Nucleic acid binding | 4683     |
| 394 | BTLA     | B and T lymphocyte associated                                |                      | 151888   |
| 395 | TUG1     | taurine up-regulated 1                                       |                      | 55000    |
| 396 | SYNPO2   | synaptopodin 2                                               | Cellular structure   | 171024   |
| 397 | NRP1     | neuropilin 1                                                 |                      | 8829     |
| 398 | CLDN4    | claudin 4                                                    | Cell-cell junction   | 1364     |
| 399 | SLC22A18 | solute carrier family 22 member 18                           | Transporter          | 5002     |
| 400 | ERLNC1   | estrogen receptor responsive lncRNA 1                        |                      | 1.02E+08 |
| 401 | EPHA2    | EPH receptor A2                                              | Kinase               | 1969     |
| 402 | MIR18A   | microRNA 18a                                                 |                      | 406953   |
| 403 | CARD11   | caspase recruitment domain family member 11                  |                      | 84433    |
| 404 | ST3GAL1  | ST3 beta-galactoside alpha-2,3-sialyltransferase 1           |                      | 6482     |
| 405 | DICER1   | dicer 1, ribonuclease III                                    | Enzyme               | 23405    |
| 406 | LMLN     | leishmanolysin like peptidase                                | Enzyme               | 89782    |
| 407 | BDNF     | brain derived neurotrophic factor                            | Signaling            | 627      |
| 408 | CSF1     | colony stimulating factor 1                                  |                      | 1435     |



|     |          |                                                                 |                            |          |
|-----|----------|-----------------------------------------------------------------|----------------------------|----------|
| 409 | CAMK2D   | calcium/calmodulin dependent protein kinase II delta            | Kinase                     | 817      |
| 410 | E2F1     | E2F transcription factor 1                                      | Nucleic acid binding       | 1869     |
| 411 | NRP2     | neuropilin 2                                                    |                            | 8828     |
| 412 | LAG3     | lymphocyte activating 3                                         | Receptor                   | 3902     |
| 413 | KRAS     | KRAS proto-oncogene, GTPase                                     | Enzyme modulator           | 3845     |
| 414 | CDX2     | caudal type homeobox 2                                          | Transcription factor       | 1045     |
| 415 | RPSA     | ribosomal protein SA                                            | Nucleic acid binding       | 3921     |
| 416 | MAPT     | microtubule associated protein tau                              |                            | 4137     |
| 417 | CTAG2    | cancer/testis antigen 2                                         |                            | 30848    |
| 418 | CXCL8    | C-X-C motif chemokine ligand 8                                  | Signaling                  | 3576     |
| 419 | ECM1     | extracellular matrix protein 1                                  |                            | 1893     |
| 420 | EGFL7    | EGF like domain multiple 7                                      | Calcium-binding protein    | 51162    |
| 421 | YY1      | YY1 transcription factor                                        | Transcription factor       | 7528     |
| 422 | CCN2     | cellular communication network factor 2                         | Signaling                  | 1490     |
| 423 | CDK6     | cyclin dependent kinase 6                                       | Kinase                     | 1021     |
| 424 | ANO1     | anoctamin 1                                                     | Ion channel                | 55107    |
| 425 | SMAD7    | SMAD family member 7                                            | Transcription factor       | 4092     |
| 426 | FGFR2    | fibroblast growth factor receptor 2                             | Kinase                     | 2263     |
| 427 | XRCC3    | X-ray repair cross complementing 3                              |                            | 7517     |
| 428 | CSF3     | colony stimulating factor 3                                     |                            | 1440     |
| 429 | ACRBP    | acrosin binding protein                                         |                            | 84519    |
| 430 | CHUK     | component of inhibitor of nuclear factor kappa B kinase complex | Kinase                     | 1147     |
| 431 | IL22     | interleukin 22                                                  |                            | 50616    |
| 432 | MIR506   | microRNA 506                                                    |                            | 574511   |
| 433 | RAD51C   | RAD51 paralog C                                                 |                            | 5889     |
| 434 | HAGLROS  | HAGLR opposite strand lncRNA                                    |                            | 1.03E+08 |
| 435 | SFRP4    | secreted frizzled related protein 4                             |                            | 6424     |
| 436 | AGTR1    | angiotensin II receptor type 1                                  | G-protein coupled receptor | 185      |
| 437 | RRBP1    | ribosome binding protein 1                                      |                            | 6238     |
| 438 | CSNK1D   | casein kinase 1 delta                                           | Kinase                     | 1453     |
| 439 | PRSS3    | serine protease 3                                               | Enzyme                     | 5646     |
| 440 | CTSD     | cathepsin D                                                     | Enzyme                     | 1509     |
| 441 | MIR510   | microRNA 510                                                    |                            | 574515   |
| 442 | TWINK    | twinkle mtDNA helicase                                          | Enzyme                     | 56652    |
| 443 | PTCH1    | patched 1                                                       |                            | 5727     |
| 444 | ERCC3    | ERCC excision repair 3, TFIIH core complex helicase subunit     | Enzyme                     | 2071     |
| 445 | SERPINF2 | serpin family F member 2                                        | Enzyme modulator           | 5345     |
| 446 | FANCF    | FA complementation group F                                      |                            | 2188     |
| 447 | CHKA     | choline kinase alpha                                            | Kinase                     | 1119     |
| 448 | HSP90AA1 | heat shock protein 90 alpha family class A member 1             | Chaperone                  | 3320     |

|     |           |                                                          |                            |        |
|-----|-----------|----------------------------------------------------------|----------------------------|--------|
| 449 | PARP1     | poly(ADP-ribose) polymerase 1                            |                            | 142    |
| 450 | CD34      | CD34 molecule                                            |                            | 947    |
| 451 | MCTS1     | MCTS1 re-initiation and release factor                   | Receptor                   | 28985  |
| 452 | GPX6      | glutathione peroxidase 6                                 | Enzyme                     | 257202 |
| 453 | ENG       | endoglin                                                 |                            | 2022   |
| 454 | SULT1E1   | sulfotransferase family 1E member 1                      |                            | 6783   |
| 455 | MYLIP     | myosin regulatory light chain interacting protein        |                            | 29116  |
| 456 | STN1      | STN1 subunit of CST complex                              |                            | 79991  |
| 457 | CARM1     | coactivator associated arginine methyltransferase 1      | Epigenetic regulator       | 10498  |
| 458 | SFRP5     | secreted frizzled related protein 5                      |                            | 6425   |
| 459 | MYD88     | MYD88 innate immune signal transduction adaptor          | Enzyme modulator           | 4615   |
| 460 | HOXA11-AS | HOXA11 antisense RNA                                     |                            | 221883 |
| 461 | EBAG9     | estrogen receptor binding site associated antigen 9      |                            | 9166   |
| 462 | ASPM      | abnormal spindle microtubule assembly                    |                            | 259266 |
| 463 | RACK1     | receptor for activated C kinase 1                        |                            | 10399  |
| 464 | IL2RA     | interleukin 2 receptor subunit alpha                     | Receptor                   | 3559   |
| 465 | CD24      | CD24 molecule                                            |                            | 1E+08  |
| 466 | NSF       | N-ethylmaleimide sensitive factor, vesicle fusing ATPase | Enzyme                     | 4905   |
| 467 | FAP       | fibroblast activation protein alpha                      | Enzyme                     | 2191   |
| 468 | MIR802    | microRNA 802                                             |                            | 768219 |
| 469 | LINC01118 | long intergenic non-protein coding RNA 1118              |                            | 388948 |
| 470 | SERPINA7  | serpin family A member 7                                 | Enzyme modulator           | 6906   |
| 471 | DENR      | density regulated re-initiation and release factor       | Enzyme                     | 8562   |
| 472 | ADRA2B    | adrenoceptor alpha 2B                                    | G-protein coupled receptor | 151    |
| 473 | PEA15     | proliferation and apoptosis adaptor protein 15           |                            | 8682   |
| 474 | FGF7      | fibroblast growth factor 7                               | Signaling                  | 2252   |
| 475 | IL37      | interleukin 37                                           |                            | 27178  |
| 476 | GSTK1     | glutathione S-transferase kappa 1                        |                            | 373156 |
| 477 | FOXA1     | forkhead box A1                                          | Transcription factor       | 3169   |
| 478 | ABI1      | abl interactor 1                                         | Enzyme modulator           | 10006  |
| 479 | AMH       | anti-Mullerian hormone                                   |                            | 268    |
| 480 | TET2      | tet methylcytosine dioxygenase 2                         |                            | 54790  |
| 481 | HK2       | hexokinase 2                                             | Kinase                     | 3099   |
| 482 | EPHX1     | epoxide hydrolase 1                                      |                            | 2052   |
| 483 | TNFAIP8   | TNF alpha induced protein 8                              |                            | 25816  |
| 484 | ICAM1     | intercellular adhesion molecule 1                        |                            | 3383   |
| 485 | CALCRL    | calcitonin receptor like receptor                        | G-protein coupled receptor | 10203  |
| 486 | BCL2L1    | BCL2 like 1                                              | Signaling                  | 598    |
| 487 | MIRLET7I  | microRNA let-7i                                          |                            | 406891 |

|     |          |                                                                   |                      |          |
|-----|----------|-------------------------------------------------------------------|----------------------|----------|
| 488 | MIR136   | microRNA 136                                                      |                      | 406927   |
| 489 | MAPK3    | mitogen-activated protein kinase 3                                | Kinase               | 5595     |
| 490 | MIR940   | microRNA 940                                                      |                      | 1E+08    |
| 491 | TRIM44   | tripartite motif containing 44                                    |                      | 54765    |
| 492 | GRN      | granulin precursor                                                |                      | 2896     |
| 493 | PROM1    | prominin 1                                                        | Transporter          | 8842     |
| 494 | MIR10B   | microRNA 10b                                                      |                      | 406903   |
| 495 | STOML2   | stomatin like 2                                                   | Enzyme modulator     | 30968    |
| 496 | MSH2     | mutS homolog 2                                                    | Nucleic acid binding | 4436     |
| 497 | ZEB2     | zinc finger E-box binding homeobox 2                              | Transcription factor | 9839     |
| 498 | CYLD     | CYLD lysine 63 deubiquitinase                                     | Enzyme               | 1540     |
| 499 | SERPINE1 | serpin family E member 1                                          | Enzyme modulator     | 5054     |
| 500 | HFE      | homeostatic iron regulator                                        |                      | 3077     |
| 501 | SMN1     | survival of motor neuron 1, telomeric                             | Epigenetic regulator | 6606     |
| 502 | SLC13A5  | solute carrier family 13 member 5                                 | Transporter          | 284111   |
| 503 | BACH1    | BTB domain and CNC homolog 1                                      |                      | 571      |
| 504 | RSAD2    | radical S-adenosyl methionine domain containing 2                 |                      | 91543    |
| 505 | CTBP2    | C-terminal binding protein 2                                      | Transcription factor | 1488     |
| 506 | USHBP1   | USH1 protein network component harmonin binding protein 1         |                      | 83878    |
| 507 | MEG3     | maternally expressed 3                                            |                      | 55384    |
| 508 | RAD51    | RAD51 recombinase                                                 |                      | 5888     |
| 509 | CRK      | CRK proto-oncogene, adaptor protein                               |                      | 1398     |
| 510 | RNASET2  | ribonuclease T2                                                   |                      | 8635     |
| 511 | NEDD9    | neural precursor cell expressed, developmentally down-regulated 9 |                      | 4739     |
| 512 | HSPA1B   | heat shock protein family A (Hsp70) member 1B                     |                      | 3304     |
| 513 | ETV5     | ETS variant transcription factor 5                                | Transcription factor | 2119     |
| 514 | SLC39A11 | solute carrier family 39 member 11                                | Transporter          | 201266   |
| 515 | CCND2    | cyclin D2                                                         | Enzyme modulator     | 894      |
| 516 | CDCP1    | CUB domain containing protein 1                                   |                      | 64866    |
| 517 | PAX3     | paired box 3                                                      |                      | 5077     |
| 518 | KIF20A   | kinesin family member 20A                                         | Cellular structure   | 10112    |
| 519 | YAP1     | Yes associated protein 1                                          | Enzyme modulator     | 10413    |
| 520 | SIK3     | SIK family kinase 3                                               | Kinase               | 23387    |
| 521 | ITGB3    | integrin subunit beta 3                                           | Receptor             | 3690     |
| 522 | BCAT1    | branched chain amino acid transaminase 1                          | Enzyme               | 586      |
| 523 | KLK11    | kallikrein related peptidase 11                                   | Enzyme               | 11012    |
| 524 | HMMR-AS1 | HMMR antisense RNA 1                                              |                      | 1.02E+08 |
| 525 | PARD3    | par-3 family cell polarity regulator                              |                      | 56288    |
| 526 | TGFB1    | transforming growth factor beta induced                           | Signaling            | 7045     |
| 527 | HSPG2    | heparan sulfate proteoglycan 2                                    | Enzyme modulator     | 3339     |
| 528 | CD274    | CD274 molecule                                                    | Receptor             | 29126    |
| 529 | SLC52A2  | solute carrier family 52 member 2                                 | Transporter          | 79581    |
| 530 | TRIB2    | tribbles pseudokinase 2                                           | Kinase               | 28951    |

|     |            |                                                               |                      |          |
|-----|------------|---------------------------------------------------------------|----------------------|----------|
| 531 | MAD2L2     | mitotic arrest deficient 2 like 2                             |                      | 10459    |
| 532 | ZNF300P1   | zinc finger protein 300 pseudogene 1                          |                      | 134466   |
| 533 | GHRH       | growth hormone releasing hormone                              | Signaling            | 2691     |
| 534 | ADIPOQ     | adiponectin, C1Q and collagen domain containing               |                      | 9370     |
| 535 | CD44       | CD44 molecule (Indian blood group)                            |                      | 960      |
| 536 | DPY30      | dpy-30 histone methyltransferase complex regulatory subunit   |                      | 84661    |
| 537 | GALNT3     | polypeptide N-acetylgalactosaminyltransferase 3               | Enzyme               | 2591     |
| 538 | NTRK1      | neurotrophic receptor tyrosine kinase 1                       | Kinase               | 4914     |
| 539 | CCNB1      | cyclin B1                                                     | Enzyme modulator     | 891      |
| 540 | MET        | MET proto-oncogene, receptor tyrosine kinase                  | Kinase               | 4233     |
| 541 | LEP        | leptin                                                        |                      | 3952     |
| 542 | CCL22      | C-C motif chemokine ligand 22                                 | Signaling            | 6367     |
| 543 | CYP2D6     | cytochrome P450 family 2 subfamily D member 6                 |                      | 1565     |
| 544 | RUNX3      | RUNX family transcription factor 3                            | Transcription factor | 864      |
| 545 | ELANE      | elastase, neutrophil expressed                                | Enzyme               | 1991     |
| 546 | VGLL3      | vestigial like family member 3                                |                      | 389136   |
| 547 | DNAJC15    | DnaJ heat shock protein family (Hsp40) member C15             |                      | 29103    |
| 548 | CCNE1      | cyclin E1                                                     | Enzyme modulator     | 898      |
| 549 | HSPD1      | heat shock protein family D (Hsp60) member 1                  |                      | 3329     |
| 550 | SHBG       | sex hormone binding globulin                                  |                      | 6462     |
| 551 | MIR200C    | microRNA 200c                                                 |                      | 406985   |
| 552 | BCL2       | BCL2 apoptosis regulator                                      | Signaling            | 596      |
| 553 | KCNMA1-AS1 | KCNMA1 antisense RNA 1                                        |                      | 1.02E+08 |
| 554 | TOMM34     | translocase of outer mitochondrial membrane 34                |                      | 10953    |
| 555 | GSTM4      | glutathione S-transferase mu 4                                |                      | 2948     |
| 556 | DPYD       | dihydropyrimidine dehydrogenase                               | Enzyme               | 1806     |
| 557 | KDM2A      | lysine demethylase 2A                                         |                      | 22992    |
| 558 | AGT        | angiotensinogen                                               | Enzyme modulator     | 183      |
| 559 | IL6R       | interleukin 6 receptor                                        | Signaling            | 3570     |
| 560 | MNX1-AS1   | MNX1 antisense RNA 1 (head to head)                           |                      | 645249   |
| 561 | NQO2       | N-ribosyldihydronicotinamide:quinone reductase 2              |                      | 4835     |
| 562 | NEU1       | neuraminidase 1                                               | Enzyme               | 4758     |
| 563 | MAK16      | MAK16 homolog                                                 |                      | 84549    |
| 564 | SPRY2      | sprouty RTK signaling antagonist 2                            | Signaling            | 10253    |
| 565 | XPC        | XPC complex subunit, DNA damage recognition and repair factor | Nucleic acid binding | 7508     |
| 566 | NFYA       | nuclear transcription factor Y subunit alpha                  | Nucleic acid binding | 4800     |
| 567 | KIF14      | kinesin family member 14                                      | Cellular structure   | 9928     |
| 568 | NFE2L2     | nuclear factor, erythroid 2 like 2                            | Enzyme               | 4780     |
| 569 | NRF1       | nuclear respiratory factor 1                                  |                      | 4899     |
| 570 | TBX21      | T-box transcription factor 21                                 | Transcription factor | 30009    |

|     |           |                                                      |                      |          |
|-----|-----------|------------------------------------------------------|----------------------|----------|
| 571 | CCT4      | chaperonin containing TCP1 subunit 4                 | Chaperone            | 10575    |
| 572 | MIR199A2  | microRNA 199a-2                                      |                      | 406977   |
| 573 | BRD4      | bromodomain containing 4                             | Epigenetic regulator | 23476    |
| 574 | CYP19A1   | cytochrome P450 family 19 subfamily A member 1       | Enzyme               | 1588     |
| 575 | MIR29B2   | microRNA 29b-2                                       |                      | 407025   |
| 576 | ELAVL2    | ELAV like RNA binding protein 2                      |                      | 1993     |
| 577 | SET       | SET nuclear proto-oncogene                           | Enzyme modulator     | 6418     |
| 578 | NKX2-8    | NK2 homeobox 8                                       | Transcription factor | 26257    |
| 579 | XIAP      | X-linked inhibitor of apoptosis                      | Enzyme modulator     | 331      |
| 580 | CA9       | carbonic anhydrase 9                                 |                      | 768      |
| 581 | NF1       | neurofibromin 1                                      | Enzyme modulator     | 4763     |
| 582 | MIRLET7E  | microRNA let-7e                                      |                      | 406887   |
| 583 | AGER      | advanced glycosylation end-product specific receptor | Receptor             | 177      |
| 584 | MICA      | MHC class I polypeptide-related sequence A           |                      | 1.01E+08 |
| 585 | LINC01194 | long intergenic non-protein coding RNA 1194          |                      | 404663   |
| 586 | NT5E      | 5'-nucleotidase ecto                                 | Enzyme               | 4907     |
| 587 | IL18      | interleukin 18                                       |                      | 3606     |
| 588 | IGFBP2    | insulin like growth factor binding protein 2         | Enzyme modulator     | 3485     |
| 589 | KDM6B     | lysine demethylase 6B                                | Epigenetic regulator | 23135    |
| 590 | ACLY      | ATP citrate lyase                                    | Enzyme               | 47       |
| 591 | CSNK2A2   | casein kinase 2 alpha 2                              | Kinase               | 1459     |
| 592 | MELK      | maternal embryonic leucine zipper kinase             | Kinase               | 9833     |
| 593 | ITGB2     | integrin subunit beta 2                              | Receptor             | 3689     |
| 594 | CTCFL     | CCCTC-binding factor like                            | Transcription factor | 140690   |
| 595 | VEGFA     | vascular endothelial growth factor A                 | Signaling            | 7422     |
| 596 | XRCC1     | X-ray repair cross complementing 1                   |                      | 7515     |
| 597 | SEN3      | SUMO specific peptidase 3                            | Enzyme               | 26168    |
| 598 | MYC       | MYC proto-oncogene, bHLH transcription factor        | Transcription factor | 4609     |
| 599 | SPDYA     | speedy/RINGO cell cycle regulator family member A    |                      | 245711   |
| 600 | MUS81     | MUS81 structure-specific endonuclease subunit        |                      | 80198    |
| 601 | SRSF3     | serine and arginine rich splicing factor 3           | Nucleic acid binding | 6428     |
| 602 | MIR21     | microRNA 21                                          |                      | 406991   |
| 603 | ATG3      | autophagy related 3                                  | Enzyme               | 64422    |
| 604 | MMP1      | matrix metalloproteinase 1                           | Enzyme               | 4312     |
| 605 | GCLC      | glutamate-cysteine ligase catalytic subunit          | Enzyme               | 2729     |
| 606 | MIR539    | microRNA 539                                         |                      | 664612   |
| 607 | PES1      | pescadillo ribosomal biogenesis factor 1             | Nucleic acid binding | 23481    |
| 608 | TBC1D16   | TBC1 domain family member 16                         | Enzyme               | 125058   |
| 609 | MIR3129   | microRNA 3129                                        |                      | 1E+08    |
| 610 | IDO1      | indoleamine 2,3-dioxygenase 1                        |                      | 3620     |
| 611 | HOXD8     | homeobox D8                                          |                      | 3234     |
| 612 | MMP3      | matrix metalloproteinase 3                           | Enzyme               | 4314     |
| 613 | MIR590    | microRNA 590                                         |                      | 693175   |

|     |          |                                                        |                            |        |
|-----|----------|--------------------------------------------------------|----------------------------|--------|
| 614 | CCL18    | C-C motif chemokine ligand 18                          | Signaling                  | 6362   |
| 615 | BRCA2    | BRCA2 DNA repair associated                            | Nucleic acid binding       | 675    |
| 616 | FMR1     | FMRP translational regulator 1                         | Nucleic acid binding       | 2332   |
| 617 | ERCC4    | ERCC excision repair 4, endonuclease catalytic subunit | Enzyme                     | 2072   |
| 618 | MIR34A   | microRNA 34a                                           |                            | 407040 |
| 619 | MIR222   | microRNA 222                                           |                            | 407007 |
| 620 | ANXA10   | annexin A10                                            |                            | 11199  |
| 621 | MIR532   | microRNA 532                                           |                            | 693124 |
| 622 | SPRY1    | sprouty RTK signaling antagonist 1                     | Signaling                  | 10252  |
| 623 | MMP14    | matrix metalloproteinase 14                            | Enzyme                     | 4323   |
| 624 | SOD1     | superoxide dismutase 1                                 | Enzyme                     | 6647   |
| 625 | DIABLO   | diablo IAP-binding mitochondrial protein               |                            | 56616  |
| 626 | CLPTM1L  | CLPTM1 like                                            | Enzyme                     | 81037  |
| 627 | THBS1    | thrombospondin 1                                       |                            | 7057   |
| 628 | GPBR1    | G protein-coupled estrogen receptor 1                  | G-protein coupled receptor | 2852   |
| 629 | MYDGF    | myeloid derived growth factor                          |                            | 56005  |
| 630 | CDK7     | cyclin dependent kinase 7                              | Kinase                     | 1022   |
| 631 | CHEK2    | checkpoint kinase 2                                    | Kinase                     | 11200  |
| 632 | MCM2     | minichromosome maintenance complex component 2         | Enzyme                     | 4171   |
| 633 | MIR155   | microRNA 155                                           |                            | 406947 |
| 634 | SYF2     | SYF2 pre-mRNA splicing factor                          |                            | 25949  |
| 635 | PTPN6    | protein tyrosine phosphatase non-receptor type 6       |                            | 5777   |
| 636 | MTA1     | metastasis associated 1                                | Nucleic acid binding       | 9112   |
| 637 | CDK2     | cyclin dependent kinase 2                              | Kinase                     | 1017   |
| 638 | INTS2    | integrator complex subunit 2                           |                            | 57508  |
| 639 | MIR219A1 | microRNA 219a-1                                        |                            | 407002 |
| 640 | MECOM    | MDS1 and EVI1 complex locus                            |                            | 2122   |
| 641 | ESRP1    | epithelial splicing regulatory protein 1               | Nucleic acid binding       | 54845  |
| 642 | GALT     | galactose-1-phosphate uridylyltransferase              | Enzyme                     | 2592   |
| 643 | TPT1-AS1 | TPT1 antisense RNA 1                                   |                            | 1E+08  |
| 644 | VCAN     | versican                                               | Extracellular structure    | 1462   |
| 645 | RNH1     | ribonuclease/angiogenin inhibitor 1                    | Transcription factor       | 6050   |
| 646 | ALKBH5   | alkB homolog 5, RNA demethylase                        |                            | 54890  |
| 647 | FGF13    | fibroblast growth factor 13                            | Signaling                  | 2258   |
| 648 | CDKN1A   | cyclin dependent kinase inhibitor 1A                   |                            | 1026   |
| 649 | LSR      | lipolysis stimulated lipoprotein receptor              |                            | 51599  |
| 650 | GRP      | gastrin releasing peptide                              |                            | 2922   |
| 651 | CSTB     | cystatin B                                             | Enzyme modulator           | 1476   |
| 652 | FPR2     | formyl peptide receptor 2                              | G-protein coupled receptor | 2358   |
| 653 | BMI1     | BMI1 proto-oncogene, polycomb ring finger              |                            | 648    |
| 654 | FOSB     | FosB proto-oncogene, AP-1 transcription factor         | Transcription factor       | 2354   |

|     |            | subunit                                                         |                            |        |
|-----|------------|-----------------------------------------------------------------|----------------------------|--------|
| 655 | S100A7     | S100 calcium binding protein A7                                 | Calcium-binding protein    | 6278   |
| 656 | CXCR6      | C-X-C motif chemokine receptor 6                                | G-protein coupled receptor | 10663  |
| 657 | HPSE       | heparanase                                                      | Enzyme                     | 10855  |
| 658 | NFKBIA     | NFKB inhibitor alpha                                            |                            | 4792   |
| 659 | MLH1       | mutL homolog 1                                                  | Nucleic acid binding       | 4292   |
| 660 | KISS1      | KiSS-1 metastasis suppressor                                    |                            | 3814   |
| 661 | SERPINB3   | serpin family B member 3                                        | Enzyme modulator           | 6317   |
| 662 | LIN28A     | lin-28 homolog A                                                | Nucleic acid binding       | 79727  |
| 663 | MARCHF1    | membrane associated ring-CH-type finger 1                       |                            | 55016  |
| 664 | BNC2       | basonuclin 2                                                    | Nucleic acid binding       | 54796  |
| 665 | ROR1       | receptor tyrosine kinase like orphan receptor 1                 | Kinase                     | 4919   |
| 666 | BRAF       | B-Raf proto-oncogene, serine/threonine kinase                   | Kinase                     | 673    |
| 667 | BABAM2     | BRISC and BRCA1 A complex member 2                              |                            | 9577   |
| 668 | AKT3       | AKT serine/threonine kinase 3                                   | Kinase                     | 10000  |
| 669 | AMHR2      | anti-Mullerian hormone receptor type 2                          | Kinase                     | 269    |
| 670 | LINC00472  | long intergenic non-protein coding RNA 472                      |                            | 79940  |
| 671 | ACKR3      | atypical chemokine receptor 3                                   | G-protein coupled receptor | 57007  |
| 672 | HYAL1      | hyaluronidase 1                                                 | Enzyme                     | 3373   |
| 673 | AGR2       | anterior gradient 2, protein disulphide isomerase family member | Enzyme                     | 10551  |
| 674 | HMGB1      | high mobility group box 1                                       | Nucleic acid binding       | 3146   |
| 675 | DPH1       | diphthamide biosynthesis 1                                      |                            | 1801   |
| 676 | ARHGEF10 L | Rho guanine nucleotide exchange factor 10 like                  | Enzyme                     | 55160  |
| 677 | PTN        | pleiotrophin                                                    | Signaling                  | 5764   |
| 678 | RYK        | receptor like tyrosine kinase                                   | Kinase                     | 6259   |
| 679 | SOX7       | SRY-box transcription factor 7                                  | Transcription factor       | 83595  |
| 680 | KLK6       | kallikrein related peptidase 6                                  | Enzyme                     | 5653   |
| 681 | RECQL      | RecQ like helicase                                              | Enzyme                     | 5965   |
| 682 | SOX4       | SRY-box transcription factor 4                                  | Transcription factor       | 6659   |
| 683 | CIB2       | calcium and integrin binding family member 2                    |                            | 10518  |
| 684 | MAML2      | mastermind like transcriptional coactivator 2                   | Transcription factor       | 84441  |
| 685 | MIR98      | microRNA 98                                                     |                            | 407054 |
| 686 | NFATC1     | nuclear factor of activated T cells 1                           | Transcription factor       | 4772   |
| 687 | PLCG1      | phospholipase C gamma 1                                         | Enzyme                     | 5335   |
| 688 | UBE2I      | ubiquitin conjugating enzyme E2 I                               |                            | 7329   |
| 689 | MUC16      | mucin 16, cell surface associated                               |                            | 94025  |
| 690 | FAS        | Fas cell surface death receptor                                 |                            | 355    |
| 691 | BTN3A2     | butyrophilin subfamily 3 member A2                              | Enzyme modulator           | 11118  |
| 692 | ARF4       | ADP ribosylation factor 4                                       |                            | 378    |
| 693 | MIR215     | microRNA 215                                                    |                            | 406997 |
| 694 | MIR320A    | microRNA 320a                                                   |                            | 407037 |

|     |           |                                                                                      |                         |        |
|-----|-----------|--------------------------------------------------------------------------------------|-------------------------|--------|
| 695 | BCL9      | BCL9 transcription coactivator                                                       |                         | 607    |
| 696 | ABO       | ABO, alpha 1-3-N-acetylgalactosaminyltransferase and alpha 1-3-galactosyltransferase | Enzyme                  | 28     |
| 697 | USP10     | ubiquitin specific peptidase 10                                                      | Enzyme                  | 9100   |
| 698 | F9        | coagulation factor IX                                                                | Enzyme                  | 2158   |
| 699 | STAT4     | signal transducer and activator of transcription 4                                   | Nucleic acid binding    | 6775   |
| 700 | PRDX1     | peroxiredoxin 1                                                                      | Enzyme                  | 5052   |
| 701 | LINC01116 | long intergenic non-protein coding RNA 1116                                          |                         | 375295 |
| 702 | PIWIL1    | piwi like RNA-mediated gene silencing 1                                              |                         | 9271   |
| 703 | FOLR1     | folate receptor alpha                                                                |                         | 2348   |
| 704 | TCF12     | transcription factor 12                                                              | Transcription factor    | 6938   |
| 705 | ALOX15    | arachidonate 15-lipoxygenase                                                         | Enzyme                  | 246    |
| 706 | TP73      | tumor protein p73                                                                    | Transcription factor    | 7161   |
| 707 | DSC2      | desmocollin 2                                                                        | Cell adhesion           | 1824   |
| 708 | RET       | ret proto-oncogene                                                                   | Kinase                  | 5979   |
| 709 | RUNX1     | RUNX family transcription factor 1                                                   | Transcription factor    | 861    |
| 710 | CLDN7     | claudin 7                                                                            | Cell-cell junction      | 1366   |
| 711 | STON2     | stonin 2                                                                             | Extracellular structure | 85439  |
| 712 | GRHL2     | grainyhead like transcription factor 2                                               | Transcription factor    | 79977  |
| 713 | FAM215A   | family with sequence similarity 215 member A                                         |                         | 23591  |
| 714 | ABCC4     | ATP binding cassette subfamily C member 4                                            | Transporter             | 10257  |
| 715 | CDKN2D    | cyclin dependent kinase inhibitor 2D                                                 |                         | 1032   |
| 716 | STUB1     | STIP1 homology and U-box containing protein 1                                        |                         | 10273  |
| 717 | FBXW12    | F-box and WD repeat domain containing 12                                             |                         | 285231 |
| 718 | WWC1      | WW and C2 domain containing 1                                                        |                         | 23286  |
| 719 | MIR363    | microRNA 363                                                                         |                         | 574031 |
| 720 | EFNA1     | ephrin A1                                                                            | Kinase                  | 1942   |
| 721 | RIF1      | replication timing regulatory factor 1                                               |                         | 55183  |
| 722 | VEGFC     | vascular endothelial growth factor C                                                 | Signaling               | 7424   |
| 723 | LARP1     | La ribonucleoprotein 1, translational regulator                                      | Nucleic acid binding    | 23367  |
| 724 | INVS      | inversin                                                                             |                         | 27130  |
| 725 | MPO       | myeloperoxidase                                                                      | Enzyme                  | 4353   |
| 726 | VIM       | vimentin                                                                             |                         | 7431   |
| 727 | HOXA10    | homeobox A10                                                                         |                         | 3206   |
| 728 | NR1H2     | nuclear receptor subfamily 1 group H member 2                                        | Nuclear receptor        | 7376   |
| 729 | RUVBL1    | RuvB like AAA ATPase 1                                                               |                         | 8607   |
| 730 | DUSP1     | dual specificity phosphatase 1                                                       |                         | 1843   |
| 731 | TRIM27    | tripartite motif containing 27                                                       |                         | 5987   |
| 732 | H19       | H19 imprinted maternally expressed transcript                                        |                         | 283120 |
| 733 | TGFB1     | transforming growth factor beta receptor 1                                           | Kinase                  | 7046   |
| 734 | ACVR1C    | activin A receptor type 1C                                                           | Kinase                  | 130399 |
| 735 | ATP1B2    | ATPase Na <sup>+</sup> /K <sup>+</sup> transporting subunit beta 2                   | Transporter             | 482    |
| 736 | ATM       | ATM serine/threonine kinase                                                          | Kinase                  | 472    |
| 737 | MTERF1    | mitochondrial transcription termination factor 1                                     |                         | 7978   |



|     |         |                                                                        |                            |        |
|-----|---------|------------------------------------------------------------------------|----------------------------|--------|
| 738 | SMAD4   | SMAD family member 4                                                   | Transcription factor       | 4089   |
| 739 | CAMK2N1 | calcium/calmodulin dependent protein kinase II inhibitor 1             |                            | 55450  |
| 740 | PLK4    | polo like kinase 4                                                     | Kinase                     | 10733  |
| 741 | MGMT    | O-6-methylguanine-DNA methyltransferase                                |                            | 4255   |
| 742 | SHMT1   | serine hydroxymethyltransferase 1                                      | Enzyme                     | 6470   |
| 743 | TRIP13  | thyroid hormone receptor interactor 13                                 |                            | 9319   |
| 744 | IL6     | interleukin 6                                                          |                            | 3569   |
| 745 | PTBP1   | polypyrimidine tract binding protein 1                                 |                            | 5725   |
| 746 | LPAR2   | lysophosphatidic acid receptor 2                                       | G-protein coupled receptor | 9170   |
| 747 | STAG3   | stromal antigen 3                                                      | Nucleic acid binding       | 10734  |
| 748 | VDR     | vitamin D receptor                                                     | Nuclear receptor           | 7421   |
| 749 | ACE     | angiotensin I converting enzyme                                        | Enzyme                     | 1636   |
| 750 | L1CAM   | L1 cell adhesion molecule                                              |                            | 3897   |
| 751 | FASLG   | Fas ligand                                                             | Signaling                  | 356    |
| 752 | RGS5    | regulator of G protein signaling 5                                     | Enzyme modulator           | 8490   |
| 753 | MIR330  | microRNA 330                                                           |                            | 442902 |
| 754 | ABCG2   | ATP binding cassette subfamily G member 2 (Junior blood group)         | Transporter                | 9429   |
| 755 | FUT1    | fucosyltransferase 1 (H blood group)                                   | Enzyme                     | 2523   |
| 756 | MIR205  | microRNA 205                                                           |                            | 406988 |
| 757 | CHP2    | calcineurin like EF-hand protein 2                                     |                            | 63928  |
| 758 | CD59    | CD59 molecule (CD59 blood group)                                       |                            | 966    |
| 759 | MIR337  | microRNA 337                                                           |                            | 442905 |
| 760 | MIR655  | microRNA 655                                                           |                            | 724025 |
| 761 | MIR655  | microRNA 655                                                           |                            | 724025 |
| 762 | PALB2   | partner and localizer of BRCA2                                         |                            | 79728  |
| 763 | PIK3CG  | phosphatidylinositol-4,5-bisphosphate 3-kinase catalytic subunit gamma | Kinase                     | 5294   |
| 764 | MIR23B  | microRNA 23b                                                           |                            | 407011 |
| 765 | MIR200A | microRNA 200a                                                          |                            | 406983 |
| 766 | PIK3CA  | phosphatidylinositol-4,5-bisphosphate 3-kinase catalytic subunit alpha | Kinase                     | 5290   |
| 767 | ERBB3   | erb-b2 receptor tyrosine kinase 3                                      | Kinase                     | 2065   |
| 768 | SDC1    | syndecan 1                                                             | Extracellular structure    | 6382   |
| 769 | XPO1    | exportin 1                                                             | Receptor                   | 7514   |
| 770 | MIR142  | microRNA 142                                                           |                            | 406934 |
| 771 | CLU     | clusterin                                                              |                            | 1191   |
| 772 | CXCL12  | C-X-C motif chemokine ligand 12                                        |                            | 6387   |
| 773 | TOP2A   | DNA topoisomerase II alpha                                             |                            | 7153   |
| 774 | CX3CL1  | C-X3-C motif chemokine ligand 1                                        | Signaling                  | 6376   |
| 775 | FEN1    | flap structure-specific endonuclease 1                                 | Enzyme                     | 2237   |
| 776 | IGF1R   | insulin like growth factor 1 receptor                                  | Kinase                     | 3480   |
| 777 | ALDH1A1 | aldehyde dehydrogenase 1 family member A1                              | Enzyme                     | 216    |

|     |           |                                                                       |                            |        |
|-----|-----------|-----------------------------------------------------------------------|----------------------------|--------|
| 778 | SPARCL1   | SPARC like 1                                                          | Signaling                  | 8404   |
| 779 | CARTPT    | CART prepropeptide                                                    |                            | 9607   |
| 780 | TNFRSF10B | TNF receptor superfamily member 10b                                   |                            | 8795   |
| 781 | HIF1A     | hypoxia inducible factor 1 subunit alpha                              | Transcription factor       | 3091   |
| 782 | RELA      | RELA proto-oncogene, NF-kB subunit                                    | Transcription factor       | 5970   |
| 783 | ST14      | suppression of tumorigenicity 14                                      | Enzyme                     | 6768   |
| 784 | SURF6     | surfeit 6                                                             | Nucleic acid binding       | 6838   |
| 785 | MLLT10    | MLLT10 histone lysine methyltransferase<br>DOT1L cofactor             | Transcription factor       | 8028   |
| 786 | S100A10   | S100 calcium binding protein A10                                      | Calcium-binding<br>protein | 6281   |
| 787 | ACTB      | actin beta                                                            | Cellular structure         | 60     |
| 788 | TLR4      | toll like receptor 4                                                  |                            | 7099   |
| 789 | MIR17     | microRNA 17                                                           |                            | 406952 |
| 790 | INSR      | insulin receptor                                                      | Kinase                     | 3643   |
| 791 | PHF13     | PHD finger protein 13                                                 | Epigenetic regulator       | 148479 |
| 792 | FGF3      | fibroblast growth factor 3                                            | Signaling                  | 2248   |
| 793 | MIR383    | microRNA 383                                                          |                            | 494332 |
| 794 | CT45A1    | cancer/testis antigen family 45 member A1                             |                            | 541466 |
| 795 | CHD5      | chromodomain helicase DNA binding protein 5                           |                            | 26038  |
| 796 | FLOT1     | flotillin 1                                                           |                            | 10211  |
| 797 | AKT1      | AKT serine/threonine kinase 1                                         | Kinase                     | 207    |
| 798 | MIR130B   | microRNA 130b                                                         |                            | 406920 |
| 799 | HSD17B12  | hydroxysteroid 17-beta dehydrogenase 12                               |                            | 51144  |
| 800 | NES       | nestin                                                                |                            | 10763  |
| 801 | MALAT1    | metastasis associated lung adenocarcinoma<br>transcript 1             |                            | 378938 |
| 802 | MAP2K1    | mitogen-activated protein kinase kinase 1                             | Kinase                     | 5604   |
| 803 | MIR874    | microRNA 874                                                          |                            | 1E+08  |
| 804 | MIR217    | microRNA 217                                                          |                            | 406999 |
| 805 | WNT4      | Wnt family member 4                                                   | Signaling                  | 54361  |
| 806 | MIR520G   | microRNA 520g                                                         |                            | 574484 |
| 807 | AKR1C3    | aldo-keto reductase family 1 member C3                                | Enzyme                     | 8644   |
| 808 | SPARC     | secreted protein acidic and cysteine rich                             | Signaling                  | 6678   |
| 809 | SERPINC1  | serpin family C member 1                                              | Enzyme modulator           | 462    |
| 810 | F3        | coagulation factor III, tissue factor                                 | Receptor                   | 2152   |
| 811 | NR1I2     | nuclear receptor subfamily 1 group I member 2                         | Nuclear receptor           | 8856   |
| 812 | KPNB1     | karyopherin subunit beta 1                                            | Transporter                | 3837   |
| 813 | FOXO3     | forkhead box O3                                                       |                            | 2309   |
| 814 | KHDRBS1   | KH RNA binding domain containing, signal<br>transduction associated 1 | Nucleic acid binding       | 10657  |
| 815 | CTHRC1    | collagen triple helix repeat containing 1                             | Enzyme                     | 115908 |
| 816 | GPC6      | glypican 6                                                            |                            | 10082  |
| 817 | CDKN2A    | cyclin dependent kinase inhibitor 2A                                  |                            | 1029   |
| 818 | CASP2     | caspase 2                                                             | Enzyme                     | 835    |
| 819 | SERBP1    | SERPINE1 mRNA binding protein 1                                       | Nucleic acid binding       | 26135  |

|     |          |                                                       |                            |        |
|-----|----------|-------------------------------------------------------|----------------------------|--------|
| 820 | CSF1R    | colony stimulating factor 1 receptor                  | Kinase                     | 1436   |
| 821 | ATAD5    | ATPase family AAA domain containing 5                 |                            | 79915  |
| 822 | AR       | androgen receptor                                     | Nuclear receptor           | 367    |
| 823 | PLXDC1   | plexin domain containing 1                            |                            | 57125  |
| 824 | PNPO     | pyridoxamine 5'-phosphate oxidase                     | Enzyme                     | 55163  |
| 825 | CDH5     | cadherin 5                                            |                            | 1003   |
| 826 | SSTR4    | somatostatin receptor 4                               | G-protein coupled receptor | 6754   |
| 827 | FOSL1    | FOS like 1, AP-1 transcription factor subunit         | Transcription factor       | 8061   |
| 828 | GSTT1    | glutathione S-transferase theta 1                     |                            | 2952   |
| 829 | CD40LG   | CD40 ligand                                           | Signaling                  | 959    |
| 830 | ARHGAP27 | Rho GTPase activating protein 27                      | Enzyme modulator           | 201176 |
| 831 | PRSS1    | serine protease 1                                     | Enzyme                     | 5644   |
| 832 | MIR551B  | microRNA 551b                                         |                            | 693136 |
| 833 | SRY      | sex determining region Y                              | Transcription factor       | 6736   |
| 834 | ADAM12   | ADAM metallopeptidase domain 12                       | Enzyme                     | 8038   |
| 835 | GAS5     | growth arrest specific 5                              |                            | 60674  |
| 836 | B4GALNT1 | beta-1,4-N-acetyl-galactosaminyltransferase 1         |                            | 2583   |
| 837 | SMO      | smoothened, frizzled class receptor                   | G-protein coupled receptor | 6608   |
| 838 | UTRN     | utrophin                                              |                            | 7402   |
| 839 | RHOC     | ras homolog family member C                           | Enzyme modulator           | 389    |
| 840 | MKNK1    | MAPK interacting serine/threonine kinase 1            | Kinase                     | 8569   |
| 841 | MSH6     | mutS homolog 6                                        | Nucleic acid binding       | 2956   |
| 842 | FOXA2    | forkhead box A2                                       | Transcription factor       | 3170   |
| 843 | PTK2     | protein tyrosine kinase 2                             | Kinase                     | 5747   |
| 844 | MIR34B   | microRNA 34b                                          |                            | 407041 |
| 845 | ALCAM    | activated leukocyte cell adhesion molecule            | Cell adhesion              | 214    |
| 846 | EZR      | eZRin                                                 | Cellular structure         | 7430   |
| 847 | FGFR3    | fibroblast growth factor receptor 3                   | Kinase                     | 2261   |
| 848 | TP73-AS1 | TP73 antisense RNA 1                                  |                            | 57212  |
| 849 | CHI3L1   | chitinase 3 like 1                                    |                            | 1116   |
| 850 | VTCN1    | V-set domain containing T cell activation inhibitor 1 | Enzyme modulator           | 79679  |
| 851 | KIF2A    | kinesin family member 2A                              | Cellular structure         | 3796   |
| 852 | RARB     | retinoic acid receptor beta                           | Nuclear receptor           | 5915   |
| 853 | TCF4     | transcription factor 4                                | Transcription factor       | 6925   |
| 854 | AURKA    | aurora kinase A                                       | Kinase                     | 6790   |
| 855 | AHCYL1   | adenosylhomocysteinase like 1                         | Enzyme                     | 10768  |
| 856 | KRT17    | keratin 17                                            |                            | 3872   |
| 857 | TRAF2    | TNF receptor associated factor 2                      | Signaling                  | 7186   |
| 858 | MIR29B1  | microRNA 29b-1                                        |                            | 407024 |
| 859 | SNAI1    | snail family transcriptional repressor 1              |                            | 6615   |
| 860 | CHAF1A   | chromatin assembly factor 1 subunit A                 | Nucleic acid binding       | 10036  |
| 861 | GC       | GC vitamin D binding protein                          | Transporter                | 2638   |
| 862 | MIR424   | microRNA 424                                          |                            | 494336 |

|     |         |                                                        |                            |        |
|-----|---------|--------------------------------------------------------|----------------------------|--------|
| 863 | FRA7G   | fragile site, aphidicolin type, common, fra(7)(q31.2)  |                            | 2414   |
| 864 | FANCA   | FA complementation group A                             |                            | 2175   |
| 865 | EGF     | epidermal growth factor                                |                            | 1950   |
| 866 | USP17L2 | ubiquitin specific peptidase 17 like family member 2   |                            | 377630 |
| 867 | THY1    | Thy-1 cell surface antigen                             |                            | 7070   |
| 868 | KIT     | KIT proto-oncogene, receptor tyrosine kinase           | Kinase                     | 3815   |
| 869 | MIR210  | microRNA 210                                           |                            | 406992 |
| 870 | WNT5A   | Wnt family member 5A                                   | Signaling                  | 7474   |
| 871 | KLK4    | kallikrein related peptidase 4                         | Enzyme                     | 9622   |
| 872 | IL31    | interleukin 31                                         |                            | 386653 |
| 873 | CTNNB1  | catenin beta 1                                         |                            | 1499   |
| 874 | MIR141  | microRNA 141                                           |                            | 406933 |
| 875 | FSHR    | follicle stimulating hormone receptor                  | G-protein coupled receptor | 2492   |
| 876 | BAG3    | BAG cochaperone 3                                      |                            | 9531   |
| 877 | CCND1   | cyclin D1                                              | Enzyme modulator           | 595    |
| 878 | DKK4    | dickkopf WNT signaling pathway inhibitor 4             |                            | 27121  |
| 879 | SIK2    | salt inducible kinase 2                                | Kinase                     | 23235  |
| 880 | RPL17   | ribosomal protein L17                                  |                            | 6139   |
| 881 | BCL6    | BCL6 transcription repressor                           |                            | 604    |
| 882 | RAB25   | RAB25, member RAS oncogene family                      |                            | 57111  |
| 883 | TGFB1I1 | transforming growth factor beta 1 induced transcript 1 | Cellular structure         | 7041   |
| 884 | LMX1A   | LIM homeobox transcription factor 1 alpha              | Nucleic acid binding       | 4009   |
| 885 | ABCA12  | ATP binding cassette subfamily A member 12             | Transporter                | 26154  |
| 886 | MRC1    | mannose receptor C-type 1                              |                            | 4360   |
| 887 | CLIC1   | chloride intracellular channel 1                       | Ion channel                | 1192   |
| 888 | SLC2A1  | solute carrier family 2 member 1                       | Transporter                | 6513   |
| 889 | EPCAM   | epithelial cell adhesion molecule                      |                            | 4072   |
| 890 | HAGLR   | HOXD antisense growth-associated long non-coding RNA   |                            | 401022 |
| 891 | CDH3    | cadherin 3                                             |                            | 1001   |
| 892 | KDM5B   | lysine demethylase 5B                                  | Epigenetic regulator       | 10765  |
| 893 | PRR13   | proline rich 13                                        |                            | 54458  |
| 894 | FLT1    | fms related receptor tyrosine kinase 1                 | Kinase                     | 2321   |
| 895 | HOTAIR  | HOX transcript antisense RNA                           |                            | 1E+08  |
| 896 | SMAD2   | SMAD family member 2                                   | Transcription factor       | 4087   |
| 897 | GSTM1   | glutathione S-transferase mu 1                         |                            | 2944   |
| 898 | PRSS2   | serine protease 2                                      | Enzyme                     | 5645   |
| 899 | PGF     | placental growth factor                                | Signaling                  | 5228   |
| 900 | MIR214  | microRNA 214                                           |                            | 406996 |
| 901 | DKK3    | dickkopf WNT signaling pathway inhibitor 3             |                            | 27122  |
| 902 | POSTN   | periostin                                              | Signaling                  | 10631  |
| 903 | PLA2G1B | phospholipase A2 group IB                              | Enzyme                     | 5319   |

|     |            |                                                                  |                            |          |
|-----|------------|------------------------------------------------------------------|----------------------------|----------|
| 904 | TCEAL7     | transcription elongation factor A like 7                         | Transcription factor       | 56849    |
| 905 | ICMT       | isoprenylcysteine carboxyl methyltransferase                     |                            | 23463    |
| 906 | ANIB1      | aneurysm, intracranial berry 1                                   |                            | 116833   |
| 907 | PRIMA1     | proline rich membrane anchor 1                                   |                            | 145270   |
| 908 | AKAP6      | A-kinase anchoring protein 6                                     |                            | 9472     |
| 909 | PRPF31     | pre-mRNA processing factor 31                                    | Nucleic acid binding       | 26121    |
| 910 | NAT2       | N-acetyltransferase 2                                            | Enzyme                     | 10       |
| 911 | XIST       | X inactive specific transcript                                   |                            | 7503     |
| 912 | F2R        | coagulation factor II thrombin receptor                          | G-protein coupled receptor | 2149     |
| 913 | MIR143     | microRNA 143                                                     |                            | 406935   |
| 914 | MAP2K7     | mitogen-activated protein kinase kinase 7                        | Kinase                     | 5609     |
| 915 | AFDN       | afadin, adherens junction formation factor                       | Cellular structure         | 4301     |
| 916 | STIP1      | stress induced phosphoprotein 1                                  |                            | 10963    |
| 917 | HLA-G      | major histocompatibility complex, class I, G                     |                            | 3135     |
| 918 | MTDH       | metadherin                                                       |                            | 92140    |
| 919 | TRPC6      | transient receptor potential cation channel subfamily C member 6 | Ion channel                | 7225     |
| 920 | FBP1       | fructose-bisphosphatase 1                                        | Enzyme                     | 2203     |
| 921 | TERT       | telomerase reverse transcriptase                                 | Enzyme                     | 7015     |
| 922 | SPA17      | sperm autoantigenic protein 17                                   |                            | 53340    |
| 923 | GALNT14    | polypeptide N-acetylgalactosaminyltransferase 14                 | Enzyme                     | 79623    |
| 924 | FBXW7      | F-box and WD repeat domain containing 7                          | Enzyme modulator           | 55294    |
| 925 | KRT7       | keratin 7                                                        |                            | 3855     |
| 926 | STS        | steroid sulfatase                                                | Enzyme                     | 412      |
| 927 | TP53       | tumor protein p53                                                | Transcription factor       | 7157     |
| 928 | ABHD11-AS1 | ABHD11 antisense RNA 1 (tail to tail)                            |                            | 171022   |
| 929 | STK11      | serine/threonine kinase 11                                       | Kinase                     | 6794     |
| 930 | MIR184     | microRNA 184                                                     |                            | 406960   |
| 931 | HNF1B      | HNF1 homeobox B                                                  | Nucleic acid binding       | 6928     |
| 932 | CTAG1B     | cancer/testis antigen 1B                                         |                            | 1485     |
| 933 | ADAM17     | ADAM metallopeptidase domain 17                                  |                            | 6868     |
| 934 | LINC00968  | long intergenic non-protein coding RNA 968                       |                            | 1.01E+08 |
| 935 | USP5       | ubiquitin specific peptidase 5                                   | Enzyme                     | 8078     |
| 936 | CFLAR      | CASP8 and FADD like apoptosis regulator                          | Enzyme                     | 8837     |
| 937 | MIR150     | microRNA 150                                                     |                            | 406942   |
| 938 | SPRY4      | sprouty RTK signaling antagonist 4                               | Signaling                  | 81848    |
| 939 | MXD1       | MAX dimerization protein 1                                       | Transcription factor       | 4084     |
| 940 | SIRT1      | sirtuin 1                                                        | Epigenetic regulator       | 23411    |
| 941 | TNFRSF6B   | TNF receptor superfamily member 6b                               |                            | 8771     |
| 942 | UGT1A      | UDP glucuronosyltransferase family 1 member A complex locus      |                            | 7361     |
| 943 | IL1B       | interleukin 1 beta                                               |                            | 3553     |
| 944 | BRS3       | bombesin receptor subtype 3                                      | G-protein coupled          | 680      |

|     |           |                                                               |                      |        |
|-----|-----------|---------------------------------------------------------------|----------------------|--------|
|     |           |                                                               | receptor             |        |
| 945 | DNM1L     | dynamin 1 like                                                | Enzyme modulator     | 10059  |
| 946 | MIR381    | microRNA 381                                                  |                      | 494330 |
| 947 | GAPDH     | glyceraldehyde-3-phosphate dehydrogenase                      | Enzyme               | 2597   |
| 948 | APC       | APC regulator of WNT signaling pathway                        |                      | 324    |
| 949 | LINC00673 | long intergenic non-protein coding RNA 673                    |                      | 1E+08  |
| 950 | GPX1      | glutathione peroxidase 1                                      | Enzyme               | 2876   |
| 951 | GNA12     | G protein subunit alpha 12                                    | Enzyme modulator     | 2768   |
| 952 | LIMK1     | LIM domain kinase 1                                           | Kinase               | 3984   |
| 953 | BCL10     | BCL10 immune signaling adaptor                                |                      | 8915   |
| 954 | TEX11     | testis expressed 11                                           |                      | 56159  |
| 955 | ESR2      | estrogen receptor 2                                           | Nuclear receptor     | 2100   |
| 956 | HGF       | hepatocyte growth factor                                      | Enzyme               | 3082   |
| 957 | PPM1D     | protein phosphatase, Mg2+/Mn2+ dependent 1D                   | Enzyme               | 8493   |
| 958 | CYP1B1    | cytochrome P450 family 1 subfamily B member 1                 | Enzyme               | 1545   |
| 959 | ROS1      | ROS proto-oncogene 1, receptor tyrosine kinase                | Kinase               | 6098   |
| 960 | PVR       | PVR cell adhesion molecule                                    |                      | 5817   |
| 961 | DHCR24    | 24-dehydrocholesterol reductase                               | Enzyme               | 1718   |
| 962 | PLAU      | plasminogen activator, urokinase                              | Enzyme               | 5328   |
| 963 | PTEN      | phosphatase and tensin homolog                                | Enzyme               | 5728   |
| 964 | MIR328    | microRNA 328                                                  |                      | 442901 |
| 965 | SERPINB5  | serpin family B member 5                                      | Enzyme modulator     | 5268   |
| 966 | NGF       | nerve growth factor                                           | Signaling            | 4803   |
| 967 | NANOG     | Nanog homeobox                                                | Transcription factor | 79923  |
| 968 | TGM2      | transglutaminase 2                                            | Enzyme               | 7052   |
| 969 | PTOV1     | PTOV1 extended AT-hook containing adaptor protein             | Transcription factor | 53635  |
| 970 | PTPN11    | protein tyrosine phosphatase non-receptor type 11             |                      | 5781   |
| 971 | PLK1      | polo like kinase 1                                            | Kinase               | 5347   |
| 972 | LGALS1    | galectin 1                                                    | Signaling            | 3956   |
| 973 | COL15A1   | collagen type XV alpha 1 chain                                |                      | 1306   |
| 974 | CDKN1B    | cyclin dependent kinase inhibitor 1B                          |                      | 1027   |
| 975 | BTRC      | beta-transducin repeat containing E3 ubiquitin protein ligase |                      | 8945   |
| 976 | JTB       | jumping translocation breakpoint                              |                      | 10899  |
| 977 | MUC1      | mucin 1, cell surface associated                              |                      | 4582   |
| 978 | MYH9      | myosin heavy chain 9                                          |                      | 4627   |
| 979 | MIR196B   | microRNA 196b                                                 |                      | 442920 |
| 980 | DCLK1     | doublecortin like kinase 1                                    | Kinase               | 9201   |
| 981 | HOXB3     | homeobox B3                                                   |                      | 3213   |
| 982 | CASP8     | caspase 8                                                     | Enzyme               | 841    |
| 983 | MIR203A   | microRNA 203a                                                 |                      | 406986 |
| 984 | CCNG2     | cyclin G2                                                     | Enzyme modulator     | 901    |
| 985 | MIR137    | microRNA 137                                                  |                      | 406928 |
| 986 | MIR494    | microRNA 494                                                  |                      | 574452 |

|      |           |                                                                         |                         |          |
|------|-----------|-------------------------------------------------------------------------|-------------------------|----------|
| 987  | SLC1A5    | solute carrier family 1 member 5                                        | Transporter             | 6510     |
| 988  | CXCL11    | C-X-C motif chemokine ligand 11                                         | Signaling               | 6373     |
| 989  | NRAS      | NRAS proto-oncogene, GTPase                                             | Enzyme modulator        | 4893     |
| 990  | OGG1      | 8-oxoguanine DNA glycosylase                                            |                         | 4968     |
| 991  | PIK3R3    | phosphoinositide-3-kinase regulatory subunit 3                          | Enzyme modulator        | 8503     |
| 992  | MTOR      | mechanistic target of rapamycin kinase                                  | Kinase                  | 2475     |
| 993  | WT1       | WT1 transcription factor                                                | Nucleic acid binding    | 7490     |
| 994  | LIMA1     | LIM domain and actin binding 1                                          | Enzyme                  | 51474    |
| 995  | HSPB2     | heat shock protein family B (small) member 2                            |                         | 3316     |
| 996  | KLRK1     | killer cell lectin like receptor K1                                     |                         | 22914    |
| 997  | RAD51-AS1 | RAD51 antisense RNA 1                                                   |                         | 1.01E+08 |
| 998  | SOX3      | SRY-box transcription factor 3                                          | Transcription factor    | 6658     |
| 999  | CALR      | calreticulin                                                            | Calcium-binding protein | 811      |
| 1000 | RAD52     | RAD52 homolog, DNA repair protein                                       | Nucleic acid binding    | 5893     |
| 1001 | RSPO1     | R-spondin 1                                                             |                         | 284654   |
| 1002 | SMN2      | survival of motor neuron 2, centromeric                                 |                         | 6607     |
| 1003 | BABAM1    | BRISC and BRCA1 A complex member 1                                      |                         | 29086    |
| 1004 | SEPTIN9   | septin 9                                                                | Enzyme modulator        | 10801    |
| 1005 | PRDX5     | peroxiredoxin 5                                                         |                         | 25824    |
| 1006 | CD46      | CD46 molecule                                                           |                         | 4179     |
| 1007 | CCK       | cholecystokinin                                                         |                         | 885      |
| 1008 | TUBB3     | tubulin beta 3 class III                                                | Cellular structure      | 10381    |
| 1009 | S100A6    | S100 calcium binding protein A6                                         | Calcium-binding protein | 6277     |
| 1010 | MIAT      | myocardial infarction associated transcript                             |                         | 440823   |
| 1011 | ADRM1     | adhesion regulating molecule 1                                          |                         | 11047    |
| 1012 | DDX4      | DEAD-box helicase 4                                                     |                         | 54514    |
| 1013 | AIMP2     | aminoacyl tRNA synthetase complex interacting multifunctional protein 2 |                         | 7965     |
| 1014 | ARNTL     | aryl hydrocarbon receptor nuclear translocator like                     | Transcription factor    | 406      |
| 1015 | CTCF      | CCCTC-binding factor                                                    | Transcription factor    | 10664    |
| 1016 | CCL2      | C-C motif chemokine ligand 2                                            | Signaling               | 6347     |
| 1017 | ANGPT1    | angiopoietin 1                                                          | Signaling               | 284      |
| 1018 | HMGA2     | high mobility group AT-hook 2                                           | Nucleic acid binding    | 8091     |
| 1019 | CREB5     | cAMP responsive element binding protein 5                               | Transcription factor    | 9586     |
| 1020 | ANGPT2    | angiopoietin 2                                                          | Signaling               | 285      |
| 1021 | CLOCK     | clock circadian regulator                                               |                         | 9575     |
| 1022 | KDR       | kinase insert domain receptor                                           | Kinase                  | 3791     |
| 1023 | TNC       | tenascin C                                                              |                         | 3371     |
| 1024 | MARCKS    | myristoylated alanine rich protein kinase C substrate                   |                         | 4082     |
| 1025 | MIR145    | microRNA 145                                                            |                         | 406937   |
| 1026 | PLK2      | polo like kinase 2                                                      | Kinase                  | 10769    |
| 1027 | IGF2      | insulin like growth factor 2                                            |                         | 3481     |

|      |          |                                                  |                      |        |
|------|----------|--------------------------------------------------|----------------------|--------|
| 1028 | BRIP1    | BRCA1 interacting protein C-terminal helicase 1  | Enzyme               | 83990  |
| 1029 | KLK13    | kallikrein related peptidase 13                  | Enzyme               | 26085  |
| 1030 | IL2      | interleukin 2                                    |                      | 3558   |
| 1031 | CDH1     | cadherin 1                                       |                      | 999    |
| 1032 | SERPINB6 | serpin family B member 6                         | Enzyme modulator     | 5269   |
| 1033 | IL36A    | interleukin 36 alpha                             |                      | 27179  |
| 1034 | PLEKHM1  | pleckstrin homology and RUN domain containing M1 |                      | 9842   |
| 1035 | MSX1     | msh homeobox 1                                   | Transcription factor | 4487   |
| 1036 | EGFL6    | EGF like domain multiple 6                       |                      | 25975  |
| 1037 | SLC9A1   | solute carrier family 9 member A1                | Transporter          | 6548   |
| 1038 | CTSL     | cathepsin L                                      | Enzyme               | 1514   |
| 1039 | MIR100   | microRNA 100                                     |                      | 406892 |
| 1040 | HOXA4    | homeobox A4                                      |                      | 3201   |
| 1041 | OGFR     | opioid growth factor receptor                    | Receptor             | 11054  |
| 1042 | TGFA     | transforming growth factor alpha                 | Signaling            | 7039   |
| 1043 | KIF15    | kinesin family member 15                         | Cellular structure   | 56992  |
| 1044 | HSF1     | heat shock transcription factor 1                | Transcription factor | 3297   |
| 1045 | HOXA9    | homeobox A9                                      |                      | 3205   |
| 1046 | ITM2A    | integral membrane protein 2A                     |                      | 9452   |
| 1047 | NFKBIB   | NFKB inhibitor beta                              |                      | 4793   |
| 1048 | SLC46A1  | solute carrier family 46 member 1                | Transporter          | 113235 |
| 1049 | MIR139   | microRNA 139                                     |                      | 406931 |
| 1050 | ABHD11   | abhydrolase domain containing 11                 |                      | 83451  |
| 1051 | VCAM1    | vascular cell adhesion molecule 1                |                      | 7412   |
| 1052 | REL      | REL proto-oncogene, NF-kB subunit                | Transcription factor | 5966   |
| 1053 | MIR595   | microRNA 595                                     |                      | 693180 |
| 1054 | RAD51D   | RAD51 paralog D                                  |                      | 5892   |
| 1055 | MIR146B  | microRNA 146b                                    |                      | 574447 |
| 1056 | FOXP1    | forkhead box P1                                  |                      | 27086  |
| 1057 | CPS1-IT1 | CPS1 intronic transcript 1                       |                      | 29034  |
| 1058 | C4BPB    | complement component 4 binding protein beta      |                      | 725    |
| 1059 | SOX11    | SRY-box transcription factor 11                  | Transcription factor | 6664   |
| 1060 | CCN3     | cellular communication network factor 3          | Signaling            | 4856   |
| 1061 | F11R     | F11 receptor                                     |                      | 50848  |
| 1062 | TXN      | thioredoxin                                      |                      | 7295   |
| 1063 | DDR1     | discoidin domain receptor tyrosine kinase 1      | Kinase               | 780    |
| 1064 | PTGS1    | prostaglandin-endoperoxide synthase 1            | Enzyme               | 5742   |
| 1065 | HOXC6    | homeobox C6                                      | Transcription factor | 3223   |
| 1066 | MIR1307  | microRNA 1307                                    |                      | 1E+08  |
| 1067 | PVT1     | Pvt1 oncogene                                    |                      | 5820   |
| 1068 | ANXA4    | annexin A4                                       |                      | 307    |
| 1069 | MIR186   | microRNA 186                                     |                      | 406962 |
| 1070 | GAB1     | GRB2 associated binding protein 1                | Receptor             | 2549   |
| 1071 | BAX      | BCL2 associated X, apoptosis regulator           | Signaling            | 581    |
| 1072 | GORASP1  | golgi reassembly stacking protein 1              |                      | 64689  |



|      |        |                                                             |           |        |
|------|--------|-------------------------------------------------------------|-----------|--------|
| 1073 | MIR212 | microRNA 212                                                |           | 406994 |
| 1074 | DACT1  | dishevelled binding antagonist of beta catenin 1            |           | 51339  |
| 1075 | ERCC2  | ERCC excision repair 2, TFIIH core complex helicase subunit | Enzyme    | 2068   |
| 1076 | CSF2   | colony stimulating factor 2                                 | Signaling | 1437   |
| 1077 | MMP9   | matrix metalloproteinase 9                                  | Enzyme    | 4318   |

**Table S3.** Potential targets of *C. fistula* for EOC./

| Sr. No. | Proteins                                      | Gene    | Uniprot ID |
|---------|-----------------------------------------------|---------|------------|
| 01      | Serine Protease 1                             | PRSS1   | P07477     |
| 02      | Myeloperoxidase                               | MPO     | P05164     |
| 03      | Insulin Like Growth Factor 1 Receptor         | IGF1R   | P08069     |
| 04      | Steroid Sulfatase                             | STS     | P08842     |
| 05      | Plasminogen Activator, Urokinase              | PLAU    | P00749     |
| 06      | Checkpoint Kinase 2                           | CHEK2   | O96017     |
| 07      | Kinase Insert Domain Receptor                 | KDR     | P35968     |
| 08      | Cytochrome P450 Family-1 Subfamily-B Member-1 | CYP1B1  | Q16678     |
| 09      | AKT Serine/Threonine Kinase 1                 | AKT1    | P31749     |
| 10      | Insulin Like Growth Factor Binding Protein 3  | IGFBP3  | P17936     |
| 11      | Coagulation Factor-II Thrombin Receptor       | F2R     | P25116     |
| 12      | Casein Kinase 2 Alpha 2                       | CSNK2A2 | P19784     |
| 13      | Androgen Receptor                             | AR      | P10275     |
| 14      | ATP Citrate Lyase                             | ACLY    | P53396     |
| 15      | Maternal Embryonic Leucine Zipper Kinase      | MELK    | Q14680     |
| 16      | Angiotensin II Receptor Type 1                | AGTR1   | P30556     |
| 17      | Progesterone Receptor                         | PGR     | P06401     |
| 18      | ATP-Binding Cassette Subfamily-G Member-2     | ABCG2   | Q9UNQ0     |
| 19      | Indoleamine 2,3-Dioxygenase 1                 | IDO1    | P14902     |
| 20      | Colony Stimulating Factor 1 Receptor          | CSF1R   | P07333     |
| 21      | ATP Binding Cassette Subfamily B Member 1     | ABCB1   | P08183     |
| 22      | Arachidonate 15-Lipoxygenase                  | ALOX15  | P16050     |

|    |                                                                           |         |        |
|----|---------------------------------------------------------------------------|---------|--------|
| 23 | Cytochrome-P450 Family-19 Subfamily-A Member-1                            | CYP19A1 | P11511 |
| 24 | Telomerase Reverse Transcriptase                                          | TERT    | O14746 |
| 25 | Elastase, Neutrophil Expressed                                            | ELANE   | P08246 |
| 26 | Chemokine Receptor 1 C-C Motif                                            | CCR1    | P32246 |
| 27 | Polo Like Kinase 4                                                        | PLK4    | O00444 |
| 28 | Estrogen Related Receptor Alpha                                           | ESRRA   | P11474 |
| 29 | Glutathione S-Transferase Mu 1                                            | GSTM1   | P09488 |
| 30 | Angiotensin I Converting Enzyme                                           | ACE     | P12821 |
| 31 | Vitamin D Receptor                                                        | VDR     | P11473 |
| 32 | Insulin Receptor                                                          | INSR    | P06213 |
| 33 | Polo Like Kinase 1                                                        | PLK1    | P53350 |
| 34 | B Raf Proto-Oncogene, Serine-Threonine Kinase                             | BRAF    | P15056 |
| 35 | Estrogen Receptor 1                                                       | ESR1    | P03372 |
| 36 | Protein Tyrosine Kinase-2                                                 | PTK2    | Q05397 |
| 37 | Interleukin 2                                                             | IL2     | P60568 |
| 38 | Estrogen Receptor 2                                                       | ESR2    | Q92731 |
| 39 | Nuclear Factor Kappa B Subunit 1                                          | NFKB1   | P19838 |
| 40 | Cyclin-Dependent Kinase 6                                                 | CDK6    | Q00534 |
| 41 | Cyclin-Dependent Kinase 4                                                 | CDK4    | P11802 |
| 42 | Cyclin-Dependent Kinase 2                                                 | CDK2    | P24941 |
| 43 | Albumin                                                                   | ALB     | P02768 |
| 44 | BCL2 Apoptosis Regulator                                                  | BCL2    | P10415 |
| 45 | MDM2 Proto-Oncogene                                                       | MDM2    | Q00987 |
| 46 | Cyclin-Dependent Kinase 1                                                 | CDK1    | P06493 |
| 47 | Peptidylprolyl Cis And Trans Isomerase, NIMA-Interacting 1                | PIN1    | Q13526 |
| 48 | Sex-Hormone Binding Globulin                                              | SHBG    | P04278 |
| 49 | BCL2 Like 1                                                               | BCL2L1  | Q07817 |
| 50 | DNA Topoisomerase-II Alpha                                                | TOP2A   | P11388 |
| 51 | Lysine Demethylase 5B                                                     | KDM5B   | Q9UGL1 |
| 52 | Phosphatidylinositol 4, 5-Bisphosphate 3-Kinase Catalytic Subunit (Gamma) | PIK3CG  | P48736 |

|    |                                                                        |          |        |
|----|------------------------------------------------------------------------|----------|--------|
| 53 | Inhibitor Of Nuclear Factor Kappa B Kinase Subunit Beta(IKBKB)         | IKBKB    | O14920 |
| 54 | Caspase 8                                                              | CASP8    | Q14790 |
| 55 | Caspase 3                                                              | CASP3    | P42574 |
| 56 | Caspase 2                                                              | CASP2    | P42575 |
| 57 | Carbonic Anhydrase 9                                                   | CA9      | Q16790 |
| 58 | Heat-Shock Protein 90 Family (Alpha) Class A Member 1                  | HSP90AA1 | P07900 |
| 59 | Poly ADP Ribose Polymerase 1                                           | PARP1    | P09874 |
| 60 | Matrix-Metallopeptidase 1                                              | MMP1     | P03956 |
| 61 | Matrix-Metallopeptidase 2                                              | MMP2     | P08253 |
| 62 | Matrix-Metallopeptidase 3                                              | MMP3     | P08254 |
| 63 | Matrix-Metallopeptidase 9                                              | MMP9     | P14780 |
| 64 | Sirtuin 1                                                              | SIRT1    | Q96EB6 |
| 65 | Matrix-Metallopeptidase 14                                             | MMP14    | P50281 |
| 66 | Phosphatidylinositol-4,5-Bisphosphate 3-Kinase Catalytic Subunit Alpha | PIK3CA   | P42336 |
| 67 | Interleukin 1 Beta                                                     | IL1B     | P01584 |
| 68 | KIT Proto-Oncogene, Receptor Tyrosine Kinase                           | KIT      | P10721 |
| 69 | Microtubule Associated Protein Tau                                     | MAPT     | P10636 |
| 70 | Fructose-Bisphosphatase 1                                              | FBP1     | P09467 |
| 71 | MET Proto-Oncogene, Receptor Tyrosine Kinase                           | MET      | P08581 |
| 72 | Phospholipase A2 Group IB                                              | PLA2G1B  | P04054 |
| 73 | Paraoxonase 1                                                          | PON1     | P27169 |
| 74 | Prostaglandin-Endoperoxide Synthase 2                                  | PTGS2    | P35354 |
| 75 | Thymidylate Synthetase                                                 | TYMS     | P04818 |
| 76 | RELA Proto-Oncogene, NF-Kb Subunit                                     | RELA     | Q04206 |
| 77 | Epidermal Growth Factor Receptor                                       | EGFR     | P00533 |
| 78 | Prostaglandin-Endoperoxide Synthase 1                                  | PTGS1    | P23219 |
| 79 | Cytochrome P450 Family 17 Subfamily A Member 1                         | CYP17A1  | P05093 |
| 80 | Aurora Kinase A                                                        | AURKA    | O14965 |
| 81 | Mitogen Activated Protein Kinase 8                                     | MAPK8    | P45983 |

|    |                                                   |         |        |
|----|---------------------------------------------------|---------|--------|
| 82 | Erb-B2 Receptor Tyrosine Kinase 2                 | ERBB2   | P04626 |
| 83 | KISS1 Receptor                                    | KISS1R  | Q969F8 |
| 84 | Solute Carrier Family 13 Member 5                 | SLC13A5 | Q86YT5 |
| 85 | Mitogen-Activated Protein Kinase 3                | MAPK3   | P27361 |
| 86 | Synuclein Alpha                                   | SNCA    | P37840 |
| 87 | NADPH Quinone Dehydrogenase 1                     | NQO1    | P15559 |
| 88 | Coagulation Factor X                              | F10     | P00742 |
| 89 | Nuclear Receptor Subfamily 1 Group H Member 2     | NR1H2   | P55055 |
| 90 | LIM Domain Kinase 1                               | LIMK1   | P53667 |
| 91 | Aldo Keto Reductase Family 1 Member C3            | AKR1C3  | P42330 |
| 92 | Protein Tyrosine Phosphatase Non-Receptor Type 11 | PTPN11  | Q06124 |
| 93 | Mitogen-Activated Protein Kinase 14               | MAPK14  | Q16539 |
| 94 | Programmed Cell Death 4                           | PDCD4   | Q53EL6 |
| 95 | Catenin Beta-1                                    | CTNNB1  | P35222 |
| 96 | Protein Tyrosine Phosphatase Non-Receptor Type 6  | PTPN6   | P29350 |
| 97 | TEK Receptor Tyrosine Kinase                      | TEK     | Q02763 |
| 98 | Heat Shock Protein Family A (Hsp70) Member 1A     | HSPA1A  | P0DMV8 |
